# Supplementary material
Source: PubMed Central journal article supplement (PMC2732888)
Supplement: 0904077106_ST1_PDF.pdf [file 0904077106_ST1_PDF.pdf]

## Supplemental Table S1

### Rice Accessions Used in This Study:

#### Wild Accessions:

| NSFTV # | Gene Bank # | Cornell RA # | Country of Origin | Species             | BADH2 allele |
|---------|-------------|--------------|-------------------|---------------------|--------------|
| 401_C   | IRGC 80433  | RA 6970      | India             | <i>O. rufipogon</i> | WT           |
| 402_B   | IRGC 80539  | RA 6971      | India             | <i>O. spontanea</i> | WT           |
| 403_A   | IRGC 80562  | RA 6972      | India             | <i>O. rufipogon</i> | WT           |
| 404_A   | IRGC 80582  | RA 6973      | India             | <i>O. nivara</i>    | WT           |
| 405_A   | IRGC 80586  | RA 6974      | India             | <i>O. spontanea</i> | WT           |
| 406_A   | IRGC 80592  | RA 6975      | India             | <i>O. rufipogon</i> | WT           |
| 407_C   | IRGC 80742  | RA 6976      | Myanmar           | <i>O. rufipogon</i> | WT           |
| 408_B   | IRGC 80745  | RA 6977      | Myanmar           | <i>O. spontanea</i> | WT           |
| 410_A   | IRGC 80759  | RA 6979      | Myanmar           | <i>O. nivara</i>    | WT           |
| 411_B   | IRGC 81801  | RA 6980      | Indonesia         | <i>O. rufipogon</i> | WT           |
| 412_C   | IRGC 81802  | RA 6981      | Indonesia         | <i>O. rufipogon</i> | WT           |
| 413_A   | IRGC 81850  | RA 6982      | India             | <i>O. nivara</i>    | WT           |
| 414_C   | IRGC 81903  | RA 6983      | India             | <i>O. spontanea</i> | WT           |
| 415_B   | IRGC 81909  | RA 6984      | India             | <i>O. spontanea</i> | WT           |
| 416_A   | IRGC 81970  | RA 6985      | Thailand          | <i>O. spontanea</i> | WT           |
| 417_B   | IRGC 81976  | RA 6986      | Indonesia         | <i>O. rufipogon</i> | WT           |
| 418_A   | IRGC 81977  | RA 6987      | Indonesia         | <i>O. rufipogon</i> | WT           |
| 420_A   | IRGC 81984  | RA 6989      | Laos              | <i>O. rufipogon</i> | WT           |
| 421_C   | IRGC 81990  | RA 6990      | Myanmar           | <i>O. rufipogon</i> | WT           |
| 422_A   | IRGC 81993  | RA 6991      | Vietnam           | <i>O. rufipogon</i> | WT           |
| 423_A   | IRGC 81994  | RA 6992      | Papua New Guinea  | <i>O. rufipogon</i> | WT           |
| 424_C   | IRGC 81996  | RA 6993      | Papua New Guinea  | <i>O. rufipogon</i> | WT           |
| 425_B   | IRGC 82040  | RA 6994      | Thailand          | <i>O. rufipogon</i> | WT           |
| 426_C   | IRGC 82979  | RA 6995      | Thailand          | <i>O. rufipogon</i> | WT           |
| 427_B   | IRGC 82988  | RA 6996      | China             | <i>O. rufipogon</i> | WT           |
| 428_A   | IRGC 82989  | RA 6997      | China             | <i>O. rufipogon</i> | WT           |
| 429_A   | IRGC 82990  | RA 6998      | China             | <i>O. rufipogon</i> | WT           |
| 430_B   | IRGC 82991  | RA 6999      | China             | <i>O. rufipogon</i> | WT           |
| 431_A   | IRGC 82992  | RA 7000      | China             | <i>O. rufipogon</i> | WT           |
| 432_B   | IRGC 83794  | RA 7001      | Thailand          | <i>O. rufipogon</i> | WT           |
| 433_A   | IRGC 83795  | RA 7002      | India             | <i>O. rufipogon</i> | WT           |
| 434_A   | IRGC 83823  | RA 7003      | Vietnam           | <i>O. rufipogon</i> | WT           |
| 435_C   | IRGC 86448  | RA 7004      | Thailand          | <i>O. rufipogon</i> | WT           |
| 436_A   | IRGC 86454  | RA 7005      | Vietnam           | <i>O. rufipogon</i> | WT           |

|       |             |         |            |                     |    |
|-------|-------------|---------|------------|---------------------|----|
| 437_B | IRGC 86475  | RA 7006 | India      | <i>O. rufipogon</i> | WT |
| 438_B | IRGC 86476  | RA 7007 | India      | <i>O. rufipogon</i> | WT |
| 439_A | IRGC 86486  | RA 7008 | Thailand   | <i>O. rufipogon</i> | WT |
| 440_B | IRGC 88787  | RA 7009 | Bangladesh | <i>O. rufipogon</i> | WT |
| 441_A | IRGC 92605  | RA 7010 | Indonesia  | <i>O. rufipogon</i> | WT |
| 442_A | IRGC 93181  | RA 7011 | Nepal      | <i>O. nivara</i>    | WT |
| 443_B | IRGC 93183  | RA 7012 | Nepal      | <i>O. nivara</i>    | WT |
| 444_A | IRGC 93188  | RA 7013 | Nepal      | <i>O. nivara</i>    | WT |
| 445_B | IRGC 93189  | RA 7014 | Nepal      | <i>O. nivara</i>    | WT |
| 446_A | IRGC 93224  | RA 7015 | Nepal      | <i>O. spontanea</i> | WT |
| 447_C | IRGC 93274  | RA 7016 | Indonesia  | <i>O. rufipogon</i> | WT |
| 449_A | IRGC 100195 | RA 7018 | Myanmar    | <i>O. nivara</i>    | WT |
| 450_A | IRGC 100916 | RA 7019 | China      | <i>O. rufipogon</i> | WT |
| 451_B | IRGC 101508 | RA 7020 | India      | <i>O. nivara</i>    | WT |
| 452_A | IRGC 103308 | RA 7021 | Taiwan     | <i>O. rufipogon</i> | WT |
| 453_C | IRGC 103404 | RA 7022 | Bangladesh | <i>O. rufipogon</i> | WT |
| 454_B | IRGC 103821 | RA 7023 | China      | <i>O. nivara</i>    | WT |
| 455_A | IRGC 103823 | RA 7024 | China      | <i>O. rufipogon</i> | WT |
| 456_A | IRGC 103824 | RA 7025 | China      | <i>O. nivara</i>    | WT |
| 457_B | IRGC 103838 | RA 7026 | Bangladesh | <i>O. nivara</i>    | WT |
| 458_A | IRGC 103844 | RA 7027 | Bangladesh | <i>O. rufipogon</i> | WT |
| 459_B | IRGC 103847 | RA 7028 | India      | <i>O. rufipogon</i> | WT |
| 460_C | IRGC 103848 | RA 7029 | India      | <i>O. rufipogon</i> | WT |
| 461_A | IRGC 104057 | RA 7030 | China      | <i>O. rufipogon</i> | WT |
| 462_A | IRGC 104501 | RA 7031 | India      | <i>O. rufipogon</i> | WT |
| 463_B | IRGC 104599 | RA 7032 | Sri Lanka  | <i>O. rufipogon</i> | WT |
| 464_A | IRGC 104602 | RA 7033 | Sri Lanka  | <i>O. rufipogon</i> | WT |
| 465_B | IRGC 104620 | RA 7034 | China      | <i>O. spontanea</i> | WT |
| 467_B | IRGC 104624 | RA 7036 | China      | <i>O. rufipogon</i> | WT |
| 468_B | IRGC 104626 | RA 7037 | China      | <i>O. spontanea</i> | WT |
| 469_A | IRGC 104628 | RA 7038 | China      | <i>O. spontanea</i> | WT |
| 470_A | IRGC 104632 | RA 7039 | China      | <i>O. spontanea</i> | WT |
| 471_C | IRGC 104634 | RA 7040 | China      | <i>O. spontanea</i> | WT |
| 472_B | IRGC 104636 | RA 7041 | China      | <i>O. spontanea</i> | WT |
| 473_C | IRGC 104644 | RA 7042 | Thailand   | <i>O. nivara</i>    | WT |
| 474_A | IRGC 104714 | RA 7043 | Thailand   | <i>O. rufipogon</i> | WT |
| 475_B | IRGC 104823 | RA 7044 | Thailand   | <i>O. nivara</i>    | WT |
| 476_A | IRGC 104959 | RA 7045 | China      | <i>O. spontanea</i> | WT |
| 477_A | IRGC 104967 | RA 7046 | China      | <i>O. spontanea</i> | WT |
| 478_B | IRGC 104971 | RA 7047 | China      | <i>O. spontanea</i> | WT |

|       |             |         |             |                        |    |
|-------|-------------|---------|-------------|------------------------|----|
| 479_A | IRGC 105220 | RA 7048 | Indonesia   | <i>O. officianalis</i> | WT |
| 480_B | IRGC 105250 | RA 7049 | Thailand    | <i>O. rufipogon</i>    | WT |
| 481_C | IRGC 105343 | RA 7050 | India       | <i>O. nivara</i>       | WT |
| 482_B | IRGC 105349 | RA 7051 | India       | <i>O. rufipogon</i>    | WT |
| 483_C | IRGC 105375 | RA 7052 | Thailand    | <i>O. rufipogon</i>    | WT |
| 484_C | IRGC 105388 | RA 7053 | Thailand    | <i>O. rufipogon</i>    | WT |
| 485_A | IRGC 105400 | RA 7054 | China       | <i>O. rufipogon</i>    | WT |
| 486_C | IRGC 105402 | RA 7055 | China       | <i>O. rufipogon</i>    | WT |
| 487_C | IRGC 105428 | RA 7056 | Sri Lanka   | <i>O. nivara</i>       | WT |
| 488_B | IRGC 105491 | RA 7057 | Malaysia    | <i>O. rufipogon</i>    | WT |
| 489_A | IRGC 105564 | RA 7058 | Indonesia   | <i>O. spontanea</i>    | WT |
| 490_C | IRGC 105567 | RA 7059 | Indonesia   | <i>O. rufipogon</i>    | WT |
| 491_B | IRGC 105568 | RA 7060 | Philippines | <i>O. rufipogon</i>    | WT |
| 492_B | IRGC 105569 | RA 7061 | Cambodia    | <i>O. rufipogon</i>    | WT |
| 493_A | IRGC 105706 | RA 7062 | Nepal       | <i>O. nivara</i>       | WT |
| 494_A | IRGC 105711 | RA 7063 | India       | <i>O. rufipogon</i>    | WT |
| 495_A | IRGC 105717 | RA 7064 | Cambodia    | <i>O. nivara</i>       | WT |
| 496_A | IRGC 105720 | RA 7065 | Cambodia    | <i>O. rufipogon</i>    | WT |
| 498_A | IRGC 105735 | RA 7067 | Cambodia    | <i>O. rufipogon</i>    | WT |
| 499_B | IRGC 105767 | RA 7068 | Thailand    | <i>O. rufipogon</i>    | WT |
| 500_A | IRGC 105785 | RA 7069 | Thailand    | <i>O. nivara</i>       | WT |
| 501_B | IRGC 105821 | RA 7070 | Thailand    | <i>O. nivara</i>       | WT |
| 503_B | IRGC 105843 | RA 7072 | Thailand    | <i>O. rufipogon</i>    | WT |
| 504_A | IRGC 105847 | RA 7073 | Thailand    | <i>O. rufipogon</i>    | WT |
| 505_A | IRGC 105855 | RA 7074 | Thailand    | <i>O. rufipogon</i>    | WT |
| 507_C | IRGC 105881 | RA 7076 | Bangladesh  | <i>O. rufipogon</i>    | WT |
| 508_A | IRGC 105890 | RA 7077 | Bangladesh  | <i>O. rufipogon</i>    | WT |
| 509_A | IRGC 105897 | RA 7078 | Bangladesh  | <i>O. rufipogon</i>    | WT |
| 510_A | IRGC 105898 | RA 7079 | Bangladesh  | <i>O. rufipogon</i>    | WT |
| 511_B | IRGC 105909 | RA 7080 | Thailand    | <i>O. rufipogon</i>    | WT |
| 512_A | IRGC 105942 | RA 7081 | Thailand    | <i>O. rufipogon</i>    | WT |
| 513_A |             | RA 7082 | Indonesia   | <i>O. rufipogon</i>    | WT |
| 514_C | IRGC 105956 | RA 7083 | Indonesia   | <i>O. rufipogon</i>    | WT |
| 515_A | IRGC 105958 | RA 7084 | Indonesia   | <i>O. rufipogon</i>    | WT |
| 516_B | IRGC 106036 | RA 7085 | Malaysia    | <i>O. rufipogon</i>    | WT |
| 517_A | IRGC 106057 | RA 7086 | India       | <i>O. rufipogon</i>    | WT |
| 518_A | IRGC 106078 | RA 7087 | India       | <i>O. rufipogon</i>    | WT |
| 519_B | IRGC 106115 | RA 7088 | India       | <i>O. rufipogon</i>    | WT |
| 520_C |             | RA 7089 | India       | <i>O. rufipogon</i>    | WT |
| 521_C | IRGC 106145 | RA 7090 | Laos        | <i>O. rufipogon</i>    | WT |

|       |             |         |                  |                                 |                  |
|-------|-------------|---------|------------------|---------------------------------|------------------|
| 522_B | IRGC 106150 | RA 7091 | Laos             | <i>O. rufipogon</i>             | WT               |
| 523_A | IRGC 106155 | RA 7092 | Laos             | <i>O. nivara</i>                | WT               |
| 524_C | IRGC 106156 | RA 7093 | Laos             | <i>O. rufipogon</i>             | WT               |
| 525_B | IRGC 106161 | RA 7094 | Laos             | <i>O. rufipogon</i>             | WT               |
| 526_A |             | RA 7095 | Laos             | <i>O. rufipogon</i>             | WT               |
| 528_A | IRGC 106168 | RA 7097 | Vietnam          | <i>O. rufipogon</i>             | WT               |
| 529_A | IRGC 106169 | RA 7098 | Vietnam          | <i>O. rufipogon</i>             | WT               |
| 530_B |             | RA 7099 | Papua New Guinea | <i>O. rufipogon</i>             | WT               |
| 531_C |             | RA 7100 | Papua New Guinea | <i>O. rufipogon</i>             | WT               |
| 533_B | IRGC 106327 | RA 7102 | Cambodia         | <i>O. rufipogon</i>             | WT               |
| 534_C | IRGC 106332 | RA 7103 | Cambodia         | <i>O. rufipogon</i>             | WT               |
| 535_C | IRGC 106342 | RA 7104 | Myanmar          | <i>O. rufipogon</i>             | WT               |
| 536_A | IRGC 106357 | RA 7105 | Myanmar          | <i>O. rufipogon</i>             | WT               |
| 537_B | IRGC 106384 |         | Myanmar          | <i>O. spontanea</i>             | WT               |
| 538_A | IRGC 106410 | RA 7107 | Vietnam          | <i>O. rufipogon</i>             | WT               |
| 539_A |             | RA 7108 | Vietnam          | <i>O. rufipogon</i>             | WT               |
| 540_C | IRGC 106413 | RA 7109 | Vietnam          | <i>O. rufipogon</i>             | WT               |
| 541_B | IRGC 106414 | RA 7110 | Vietnam          | <i>O. rufipogon</i>             | WT               |
| 542_A | IRGC 106415 |         | Vietnam          | <i>O. rufipogon</i>             | WT               |
| 543_A | IRGC 106420 | RA 7112 | Vietnam          | <i>O. rufipogon</i>             | WT               |
| 544_B | IRGC 106452 |         | Indonesia        | <i>O. rufipogon</i>             | WT               |
| 545_A | IRGC 106453 | RA 7114 | Indonesia        | <i>O. rufipogon</i>             | WT               |
| 546_B | IRGC 106509 | RA 7115 | Myanmar          | <i>O. rufipogon</i>             | WT               |
| 547_A | IRGC 105908 | RA 7116 | Thailand         | <i>O. rufipogon</i>             | WT               |
| 549_C | IRGC 81881  | RA 7118 | India            | <i>O. rufipogon</i>             | WT               |
| 550_B | IRGC 81887  | RA 7119 | India            | <i>O. rufipogon</i>             | WT               |
| 551_B | IRGC 100596 | RA 6768 | Taiwan           | <i>O. rufipogon/O. nivara</i>   | WT               |
| 552_C | IRGC 100920 | RA 6770 | Malaysia         | <i>O. rufipogon x O. nivara</i> | WT               |
| 553_B | IRGC 100926 | RA 6771 | Myanmar          | <i>O. rufipogon</i>             | Het (WT/badh2.1) |
| 554_A | IRGC 103305 | RA 6772 | Philippines      | <i>O. rufipogon</i>             | WT               |
| 554_B | IRGC 103305 |         | Philippines      | <i>O. rufipogon</i>             | WT               |
| 555_B | IRGC 105349 | RA 6773 | India            | <i>O. rufipogon</i>             | WT               |
| 556_A | IRGC 105494 | RA 6775 | Myanmar          | <i>O. rufipogon</i>             | WT               |
| 557_B | IRGC 105567 | RA 6776 | Indonesia        | <i>O. rufipogon</i>             | WT               |
| 558_A | IRGC 105616 | RA 6777 | unknown          | <i>O. rufipogon</i>             | WT               |
| 559_C | IRGC 105618 | RA 6778 | unknown          | <i>O. rufipogon</i>             | WT               |
| 560_B |             | RA 6779 | Cambodia         | <i>O. rufipogon</i>             | WT               |
| 561_C | IRGC 105868 | RA 6780 | Bangladesh       | <i>O. rufipogon</i>             | WT               |
| 562_C |             | RA 6781 | Bangladesh       | <i>O. rufipogon</i>             | WT               |
| 563_A |             | RA 6782 | Indonesia        | <i>O. rufipogon</i>             | WT               |

|       |             |         |                  |                                 |    |
|-------|-------------|---------|------------------|---------------------------------|----|
| 565_B |             | RA 6784 | India            | <i>O. rufipogon</i>             | WT |
| 566_B |             | RA 6785 | Laos             | <i>O. rufipogon</i>             | WT |
| 567_C | IRGC 106167 | RA 6786 | Vietnam          | <i>O. rufipogon</i>             | WT |
| 568_A | IRGC 106263 | RA 6787 | Papua New Guinea | <i>O. rufipogon</i>             | WT |
| 569_A | IRGC 106264 | RA 6788 | Papua New Guinea | <i>O. rufipogon</i>             | WT |
| 570_A | IRGC 106266 | RA 6789 | Papua New Guinea | <i>O. rufipogon</i>             | WT |
| 574_A | IRGC 106270 |         | Papua New Guinea | <i>O. rufipogon</i>             | WT |
| 574_B | IRGC 106270 | RA 6793 | Papua New Guinea | <i>O. rufipogon</i>             | WT |
| 575_A | IRGC 106272 | RA 6794 | Papua New Guinea | <i>O. rufipogon</i>             | WT |
| 576_C |             | RA 6795 | Papua New Guinea | <i>O. rufipogon</i>             | WT |
| 577_A | IRGC 106274 | RA 6796 | Papua New Guinea | <i>O. rufipogon</i>             | WT |
| 578_B | IRGC 106275 | RA 6797 | Papua New Guinea | <i>O. rufipogon</i>             | WT |
| 579_C | IRGC 106276 | RA 6798 | Papua New Guinea | <i>O. rufipogon</i>             | WT |
| 581_A | IRGC 106278 | RA 6800 | Papua New Guinea | <i>O. rufipogon</i>             | WT |
| 582_C | IRGC 106279 | RA 6801 | Papua New Guinea | <i>O. rufipogon</i>             | WT |
| 583_B | IRGC 106280 | RA 6802 | Papua New Guinea | <i>O. rufipogon</i>             | WT |
| 584_A | IRGC 106282 | RA 6803 | Papua New Guinea | <i>O. rufipogon</i>             | WT |
| 585_B |             | RA 6804 | Papua New Guinea | <i>O. rufipogon</i>             | WT |
| 587_B | IRGC 106285 | RA 6806 | Papua New Guinea | <i>O. rufipogon</i>             | WT |
| 588_C | IRGC 106286 | RA 6807 | Papua New Guinea | <i>O. rufipogon</i>             | WT |
| 590_C | IRGC 106289 | RA 6809 | Papua New Guinea | <i>O. rufipogon</i>             | WT |
| 591_A | IRGC 106290 | RA 6810 | Papua New Guinea | <i>O. rufipogon</i>             | WT |
| 592_B | IRGC 80671  | RA 6811 | India            | <i>O. rufipogon</i>             | WT |
| 593_A | IRGC 105757 | RA 6812 | Thailand         | <i>O. rufipogon</i>             | WT |
| 594_C |             | RA 6813 | Vietnam          | <i>O. rufipogon</i>             | WT |
| 599_A | IRGC 100183 | RA 2772 | India            | <i>O. rufipogon x O. sativa</i> | WT |
| 600_B | IRGC 100187 | RA 2773 | Malaysia         | <i>O. sativa/O. rufipogon</i>   | WT |
| 602_A | IRGC 100900 | RA 2775 | India            | <i>O. nivara/O. rufipogon</i>   | WT |
| 604_C | IRGC 100907 | RA 2777 | Taiwan           | <i>O. rufipogon/O. nivara</i>   | WT |
| 605_C | IRGC 100911 | RA 2778 | Thailand         | <i>O. nivara/O. rufipogon</i>   | WT |
| 655_B | IRGC 100898 | RA 7757 | India            | <i>O. nivara</i>                | WT |
| 656_B | IRGC 104443 | RA 7758 | Thailand         | <i>O. nivara</i>                | WT |
| 657_A | IRGC 104705 | RA 7759 | India            | <i>O. nivara</i>                | WT |
| 658_B | IRGC 100912 | RA 7760 | Thailand         | <i>O. nivara/O. rufipogon</i>   | WT |
| 659_B | IRGC 80774  | RA7851  | Philippines      | <i>O. rufipogon</i>             | WT |
| 660_B | IRGC 82993  | RA7852  | China            | <i>O. rufipogon</i>             | WT |
| 661_C | IRGC 99554  | RA7853  | China            | <i>O. rufipogon</i>             | WT |
| 662_C | IRGC 99555  | RA7854  | China            | <i>O. rufipogon</i>             | WT |
| 663_C | IRGC 99556  | RA7855  | China            | <i>O. rufipogon</i>             | WT |
| 664_A | IRGC 100196 | RA7856  | Myanmar          | <i>O. nivara</i>                | WT |

|       |             |        |            |                               |    |
|-------|-------------|--------|------------|-------------------------------|----|
| 665_A | IRGC 100203 | RA7857 | Myanmar    | <i>O. rufipogon/O. sativa</i> | WT |
| 666_B | IRGC 100211 | RA7858 | India      | <i>O. rufipogon</i>           | WT |
| 668_B | IRGC 100588 | RA7860 | Taiwan     | <i>O. rufipogon</i>           | WT |
| 669_C | IRGC 100593 | RA7861 | Taiwan     | <i>O. nivara</i>              | WT |
| 670_C | IRGC 100597 | RA7862 | Taiwan     | <i>O. rufipogon</i>           | WT |
| 671_A | IRGC 100599 | RA7863 | Taiwan     | <i>O. rufipogon</i>           | WT |
| 672_B | IRGC 100639 | RA7864 | Taiwan     | <i>O. rufipogon</i>           | WT |
| 673_B | IRGC 100647 | RA7865 | Taiwan     | <i>O. rufipogon</i>           | WT |
| 674_C | IRGC 100657 | RA7866 | Taiwan     | <i>O. rufipogon</i>           | WT |
| 675_C | IRGC 100678 | RA7867 | Taiwan     | <i>O. rufipogon</i>           | WT |
| 676_C | IRGC 100692 | RA7868 | Taiwan     | <i>O. rufipogon</i>           | WT |
| 677_A | IRGC 100897 | RA7869 | India      | <i>O. nivara</i>              | WT |
| 678_C | IRGC 100898 | RA7870 | India      | <i>O. nivara</i>              | WT |
| 679_B | IRGC 100899 | RA7871 | India      | <i>O. nivara</i>              | WT |
| 680_B | IRGC 100902 | RA7872 | India      | <i>O. nivara/O. rufipogon</i> | WT |
| 681_C | IRGC 100903 | RA7873 | India      | <i>O. nivara</i>              | WT |
| 682_A | IRGC 100904 | RA7874 | Thailand   | <i>O. rufipogon</i>           | WT |
| 683_A | IRGC 100918 | RA7875 | Cambodia   | <i>O. nivara</i>              | WT |
| 684_A | IRGC 100920 | RA7876 | Malaysia   | <i>O. rufipogon/O. nivara</i> | WT |
| 685_A | IRGC 100923 | RA7877 | Myanmar    | <i>O. rufipogon</i>           | WT |
| 686_C | IRGC 100926 | RA7878 | Myanmar    | <i>O. nivara</i>              | WT |
| 687_A | IRGC 101193 | RA7879 | Taiwan     | <i>O. rufipogon/O. sativa</i> | WT |
| 688_A | IRGC 101450 | RA7880 | Taiwan     | <i>O. rufipogon</i>           | WT |
| 690_C | IRGC 101942 | RA7882 | Malaysia   | <i>O. rufipogon</i>           | WT |
| 691_A | IRGC 101967 | RA7883 | India      | <i>O. nivara</i>              | WT |
| 692_C | IRGC 101979 | RA7884 | India      | <i>O. rufipogon</i>           | WT |
| 693_A | IRGC 102116 | RA7885 | Cambodia   | <i>O. rufipogon</i>           | WT |
| 694_B | IRGC 103306 | RA7886 | Taiwan     | <i>O. rufipogon</i>           | WT |
| 695_A | IRGC 103407 | RA7887 | Sri Lanka  | <i>O. rufipogon</i>           | WT |
| 696_B | IRGC 103415 | RA7888 | Sri Lanka  | <i>O. rufipogon</i>           | WT |
| 698_A | IRGC 103418 | RA7890 | Sri Lanka  | <i>O. rufipogon</i>           | WT |
| 700_A | IRGC 103423 | RA7892 | Sri Lanka  | <i>O. nivara</i>              | WT |
| 701_B | IRGC 103813 | RA7893 | China      | <i>O. nivara</i>              | WT |
| 702_B | IRGC 103814 | RA7894 | China      | <i>O. nivara/O. rufipogon</i> | WT |
| 703_A | IRGC 103817 | RA7895 | China      | <i>O. nivara</i>              | WT |
| 704_B | IRGC 103818 | RA7896 | China      | <i>O. rufipogon</i>           | WT |
| 705_B | IRGC 103822 | RA7897 | China      | <i>O. nivara</i>              | WT |
| 706_B | IRGC 103825 | RA7898 | China      | <i>O. rufipogon/O. nivara</i> | WT |
| 707_B | IRGC 103835 | RA7899 | Bangladesh | <i>O. nivara</i>              | WT |
| 708_A | IRGC 103836 | RA7900 | Bangladesh | <i>O. nivara</i>              | WT |

|       |             |        |            |                               |    |
|-------|-------------|--------|------------|-------------------------------|----|
| 709_A | IRGC 103837 | RA7901 | Bangladesh | <i>O. nivara</i>              | WT |
| 710_B | IRGC 103840 | RA7902 | Bangladesh | <i>O. nivara</i>              | WT |
| 711_A | IRGC 103841 | RA7903 | Bangladesh | <i>O. nivara</i>              | WT |
| 712_B | IRGC 103845 | RA7904 | India      | <i>O. nivara</i>              | WT |
| 713_A | IRGC 104056 | RA7905 | China      | <i>O. rufipogon/O. nivara</i> | WT |
| 714_C | IRGC 104058 | RA7906 | China      | <i>O. rufipogon/O. nivara</i> | WT |
| 715_B | IRGC 104497 | RA7907 | Thailand   | <i>O. rufipogon/O. nivara</i> | WT |
| 716_B | IRGC 104647 | RA7908 | Thailand   | <i>O. rufipogon</i>           | WT |
| 717_B | IRGC 104650 | RA7909 | Thailand   | <i>O. nivara</i>              | WT |
| 718_C | IRGC 104670 | RA7910 | Thailand   | <i>O. nivara</i>              | WT |
| 719_A | IRGC 104687 | RA7911 | India      | <i>O. nivara</i>              | WT |
| 720_A | IRGC 104703 | RA7912 | India      | <i>O. nivara</i>              | WT |
| 721_C | IRGC 104705 | RA7913 | India      | <i>O. nivara</i>              | WT |
| 722_A | IRGC 104962 | RA7914 | China      | <i>O. rufipogon/O. nivara</i> | WT |
| 723_B | IRGC 104969 | RA7915 | China      | <i>O. rufipogon/O. nivara</i> | WT |
| 724_C | IRGC 104999 | RA7916 | Indonesia  | <i>O. rufipogon</i>           | WT |
| 725_A | IRGC 105319 | RA7917 | India      | <i>O. nivara</i>              | WT |
| 727_B | IRGC 105391 | RA7919 | Thailand   | <i>O. nivara</i>              | WT |
| 728_A | IRGC 105397 | RA7920 | China      | <i>O. rufipogon/O. nivara</i> | WT |
| 729_C | IRGC 105403 | RA7921 | China      | <i>O. rufipogon/O. nivara</i> | WT |
| 731_C | IRGC 105424 | RA7923 | Sri Lanka  | <i>O. rufipogon</i>           | WT |
| 732_C | IRGC 105431 | RA7924 | Sri Lanka  | <i>O. nivara</i>              | WT |
| 733_B | IRGC 105444 | RA7925 | Sri Lanka  | <i>O. nivara</i>              | WT |
| 734_C | IRGC 105487 | RA7926 | Thailand   | <i>O. rufipogon</i>           | WT |
| 735_C | IRGC 105493 | RA7927 | Myanmar    | <i>O. rufipogon</i>           | WT |
| 737_B | IRGC 105599 | RA7929 | Thailand   | <i>O. rufipogon</i>           | WT |
| 738_B | IRGC 105601 | RA7930 | Thailand   | <i>O. rufipogon/O. nivara</i> | WT |
| 740_C | IRGC 105622 | RA7932 | India      | <i>O. rufipogon</i>           | WT |
| 741_A | IRGC 105624 | RA7933 | India      | <i>O. nivara</i>              | WT |
| 742_C | IRGC 105625 | RA7934 | India      | <i>O. nivara</i>              | WT |
| 743_C | IRGC 105705 | RA7935 | NPL        | <i>O. nivara</i>              | WT |
| 744_A | IRGC 105716 | RA7936 | Cambodia   | <i>O. nivara</i>              | WT |
| 745_A | IRGC 105738 | RA7937 | Cambodia   | <i>O. rufipogon</i>           | WT |
| 746_B | IRGC 105740 | RA7938 | Cambodia   | <i>O. nivara</i>              | WT |
| 747_C | IRGC 105742 | RA7939 | Cambodia   | <i>O. nivara</i>              | WT |
| 748_C | IRGC 105763 | RA7940 | Thailand   | <i>O. nivara</i>              | WT |
| 749_C | IRGC 105867 | RA7941 | Thailand   | <i>O. nivara</i>              | WT |
| 751_C | IRGC 105895 | RA7943 | Bangladesh | <i>O. nivara</i>              | WT |
| 752_A | IRGC 105901 | RA7944 | Bangladesh | <i>O. rufipogon</i>           | WT |
| 753_B | IRGC 105960 | RA7945 | Bangladesh | <i>O. rufipogon</i>           | WT |

|       |             |        |          |                     |    |
|-------|-------------|--------|----------|---------------------|----|
| 755_B | IRGC 106103 | RA7947 | India    | <i>O. rufipogon</i> | WT |
| 757_A | IRGC 106148 | RA7949 | Laos     | <i>O. nivara</i>    | WT |
| 759_A | IRGC 106336 | RA7951 | Cambodia | <i>O. rufipogon</i> | WT |
| 760_A | IRGC 106345 | RA7952 | Myanmar  | <i>O. nivara</i>    | WT |
| 762_C | IRGC 106396 | RA7954 | Myanmar  | <i>O. nivara</i>    | WT |

***O. sativa* accessions:**

| NSFTV # | Gene Bank # | Cornell RA # | Accession Name       | Country of Origin | Subpopulation             | <i>BADH2</i> allele | [2AP] |
|---------|-------------|--------------|----------------------|-------------------|---------------------------|---------------------|-------|
| 001     | IRGC 3135   | RA 7137      | Agostano             | Italy             | <i>temperate japonica</i> | WT                  | <0.05 |
| 003     | IRGC 51250  | RA 7139      | Ai-Chiao-Hong        | China             | <i>indica</i>             | WT                  | <0.05 |
| 004     | IRGC 12386  | RA 7140      | ARC 10177            | India             | <i>aus</i>                | WT                  | <0.05 |
| 005     | IRGC 12440  | RA 7141      | ARC 10352            | India             | <i>Group V (aromatic)</i> | <i>badh2.1</i>      | 0.48  |
| 006     | IRGC 12331  | RA 7142      | ARC 7229             | India             | <i>aus</i>                | WT                  | N/A   |
| 007     | IRGC 43325  | RA 7143      | Arias                | Indonesia         | <i>tropical japonica</i>  | <i>badh2.1</i>      | 1.07  |
| 008     | IRGC 6949   | RA 7144      | Asse Y Pung          | Philippines       | <i>tropical japonica</i>  | <i>badh2.1</i>      | 0.42  |
| 009     | IRGC 33984  | RA 7145      | Baber                | India             | <i>tropical japonica</i>  | WT                  | N/A   |
| 011     | IRGC 6590   | RA 7147      | Baugamon 14          | Bangladesh        | <i>aus</i>                | WT                  | <0.05 |
| 012     | IRGC 27805  | RA 7148      | Basmati              | Pakistan          | <i>Group V (aromatic)</i> | WT                  | <0.05 |
| 013     | IRGC 27798  | RA 7149      | Basmati 1            | Pakistan          | <i>aus</i>                | WT                  | <0.05 |
| 014     | IRGC 53637  | RA 7150      | Basmati 217          | India             | <i>Group V (aromatic)</i> | <i>badh2.1</i>      | N/A   |
| 015     | IRGC 55457  | RA 7151      | Beonjo               | Korea             | <i>tropical japonica</i>  | <i>badh2.1</i>      | N/A   |
| 016     | IRGC 38994  | RA 7152      | Bico Branco          | Brazil            | <i>Group V (aromatic)</i> | WT                  | <0.05 |
| 017     | IRGC 26872  | RA 7153      | Binulawan            | Philippines       | <i>indica</i>             | WT                  | <0.05 |
| 018     | IRGC 45195  | RA 7154      | BJ 1                 | India             | <i>aus</i>                | WT                  | <0.05 |
| 019     | IRGC 40275  | RA 7155      | BLACK GORA           | India             | <i>aus</i>                | WT                  | <0.05 |
| 021     | Clor 12248  | RA 7157      | Byakkoku Y 5006 Seln | Australia         | <i>indica</i>             | WT                  | <0.05 |
| 023     | IRGC 50448  | RA 7159      | Canella De Ferro     | Brazil            | <i>tropical japonica</i>  | WT                  | <0.05 |
| 027     | IRGC 27869  | RA 7163      | Chahora 144          | Pakistan          | <i>tropical japonica</i>  | WT                  | <0.05 |
| 028     | IRGC 30238  | RA 7164      | Champa Tong 54       | Thailand          | <i>aus</i>                | WT                  | <0.05 |
| 029     | IRGC 56036  | RA 7165      | Chau                 | Vietnam           | <i>indica</i>             | WT                  | N/A   |
| 030     | IRGC 10214  | RA 7166      | Chiem Chanh          | Vietnam           | <i>indica</i>             | WT                  | <0.05 |
| 031     | PI 431222   | RA 7167      | Chinese              | China             | <i>temperate japonica</i> | WT                  | <0.05 |
| 033     | IRGC 17052  | RA 7169      | Chuan 4              | Taiwan            | <i>aus</i>                | WT                  | <0.05 |
| 034     | IRGC 3697   | RA 7170      | CO 25                | India             | <i>indica</i>             | WT                  | N/A   |
| 035     | IRGC 6331   | RA 7171      | CO18                 | India             | <i>indica</i>             | WT                  | <0.05 |
| 036     | Clor 9675   | RA 7172      | Cs-M3                | USA               | <i>temperate japonica</i> | WT                  | N/A   |
| 037     | IRGC 10658  | RA 7173      | Cuba 65              | Cuba              | <i>tropical japonica</i>  | WT                  | <0.05 |
| 038     | IRGC 5855   | RA 7174      | DA 5                 | Bangladesh        | <i>tropical japonica</i>  | WT                  | <0.05 |
| 041     | IRGC 27630  | RA 7177      | Darmali              | Nepal             | <i>tropical japonica</i>  | WT                  | <0.05 |
| 042     | IRGC 8244   | RA 7178      | Davao                | Philippines       | <i>tropical japonica</i>  | WT                  | <0.05 |



|     |            |         |                       |               |                           |                |       |
|-----|------------|---------|-----------------------|---------------|---------------------------|----------------|-------|
| 043 | PI 279131  | RA 7179 | Dee Geo Woo Gen       | Taiwan        | <i>indica</i>             | WT             | <0.05 |
| 044 | IRGC 3686  | RA 7180 | Dhala Shaitta         | Bangladesh    | <i>aus</i>                | WT             | <0.05 |
| 045 | PI 584607  | RA 7181 | DOM-SOFID             | Iran          | <i>Group V (aromatic)</i> | <i>badh2.1</i> | 0.26  |
| 046 | IRGC 3297  | RA 7182 | Dourado Agulha        | Brazil        | <i>tropical japonica</i>  | WT             | <0.05 |
| 049 | IRGC 8839  | RA 7185 | DV85                  | Bangladesh    | <i>aus</i>                | WT             | <0.05 |
| 050 | IRGC 8555  | RA 7186 | DZ78                  | Bangladesh    | <i>aus</i>                | WT             | <0.05 |
| 051 | Clor 9738  | RA 7187 | Early Wataribune      | Japan         | <i>temperate japonica</i> | WT             | <0.05 |
| 052 | IRGC 8241  | RA 7188 | EH-1A-Chiu            | Taiwan        | <i>tropical japonica</i>  | WT             | N/A   |
| 053 | IRGC 39261 | RA 7189 | Firooz                | Iran          | <i>Group V (aromatic)</i> | WT             | <0.05 |
| 054 | Clor 1344  | RA 7190 | Fortuna               | USA           | <i>tropical japonica</i>  | WT             | <0.05 |
| 055 | IRGC 32300 | RA 7191 | Gerdeh                | Iran          | <i>Group V (aromatic)</i> | <i>badh2.1</i> | 0.35  |
| 056 | PI 597018  | RA 7192 | Geumobyeyo            | Korea         | <i>temperate japonica</i> | WT             | <0.05 |
| 057 | IRGC 32303 | RA 7193 | Gharib                | Iran          | <i>indica</i>             | WT             | N/A   |
| 058 | IRGC 58278 | RA 7194 | Ghati Kamma Nangarhar | Afghanistan   | <i>aus</i>                | WT             | <0.05 |
| 059 | IRGC 43394 | RA 7195 | Gogo Lempuk           | Indonesia     | <i>tropical japonica</i>  | <i>badh2.1</i> | N/A   |
| 060 | IRGC 43397 | RA 7196 | Gotak Gatik           | Indonesia     | <i>tropical japonica</i>  | WT             | <0.05 |
| 061 | IRGC 51300 | RA 7197 | Guan-Yin-Tsan         | China         | <i>indica</i>             | WT             | <0.05 |
| 065 | IRGC 1717  | RA 7201 | Honduras              | Honduras      | <i>tropical japonica</i>  | WT             | <0.05 |
| 066 | IRGC 8240  | RA 7202 | Hsia-Chioh-Keh-Tu     | Taiwan        | <i>indica</i>             | WT             | <0.05 |
| 067 | IRGC 8264  | RA 7203 | Hu Lo Tao             | China         | <i>temperate japonica</i> | WT             | <0.05 |
| 069 | IRGC 19642 | RA 7205 | IAC 25                | Brazil        | <i>tropical japonica</i>  | WT             | <0.05 |
| 071 | IRGC 30416 | RA 7207 | IR 36                 | Philippines   | <i>indica</i>             | WT             | <0.05 |
| 072 | PI 312627  | RA 7208 | IR 8                  | Philippines   | <i>indica</i>             | WT             | <0.05 |
| 073 | GID 58752D | RA 7209 | IRAT 177              | French Guiana | <i>tropical japonica</i>  | WT             | <0.05 |
| 075 | IRGC 17757 | RA 7211 | Jambu                 | Indonesia     | <i>tropical japonica</i>  | WT             | <0.05 |
| 076 | IRGC 11099 | RA 7212 | Jaya                  | India         | <i>indica</i>             | WT             | <0.05 |
| 077 | IRGC 9070  | RA 7213 | JC149                 | India         | <i>indica</i>             | WT             | N/A   |
| 078 | IRGC 6307  | RA 7214 | Jhona 349             | India         | <i>aus</i>                | WT             | <0.05 |
| 079 | N/A        | RA 7215 | Jouiku 393G           | Japan         | <i>temperate japonica</i> | WT             | <0.05 |
| 081 | IRGC 45975 | RA 7217 | Kalamkati             | India         | <i>aus</i>                | WT             | <0.05 |
| 083 | PI 403629  | RA 7219 | Kamenoo               | Japan         | <i>temperate japonica</i> | WT             | <0.05 |
| 085 | HO1195E    | RA 7221 | Kasalath              | India         | <i>aus</i>                | WT             | <0.05 |
| 087 | IRGC 19972 | RA 7223 | Keriting Tingii       | Indonesia     | <i>tropical japonica</i>  | <i>badh2.1</i> | 0.47  |
| 088 | IRGC 24224 | RA 7224 | Khao Gaew             | Thailand      | <i>aus</i>                | WT             | <0.05 |
| 089 | IRGC 24225 | RA 7225 | Khao Hawm             | Thailand      | <i>tropical japonica</i>  | WT             | <0.05 |
| 090 | IRGC 8180  | RA 7226 | Kiang-Chou-Chiu       | Taiwan        | <i>indica</i>             | WT             | <0.05 |
| 092 | IRGC 3782  | RA 7228 | Kinastano             | Philippines   | <i>tropical japonica</i>  | WT             | <0.05 |
| 093 | IRGC 12793 | RA 7229 | Kitrana 508           | Madagascar    | <i>Group V (aromatic)</i> | <i>badh2.1</i> | 0.48  |
| 094 | PI 330464  | RA 7230 | Koshihikari           | Japan         | <i>temperate japonica</i> | WT             | <0.05 |
| 095 | IRGC 2545  | RA 7231 | Kotobuki Mochi        | Japan         | <i>tropical japonica</i>  | WT             | <0.05 |

|     |            |         |                     |             |                           |                |       |
|-----|------------|---------|---------------------|-------------|---------------------------|----------------|-------|
| 096 | PI 597044  | RA 7232 | KU115               | Thailand    | <i>tropical japonica</i>  | WT             | N/A   |
| 097 | IRGC 8195  | RA 7233 | Kun-Min-Tsieh-Hunan | China       | <i>indica</i>             | WT             | <0.05 |
| 098 | IRGC 66292 | RA 7234 | L-202               | USA         | <i>tropical japonica</i>  | WT             | <0.05 |
| 099 | IRGC 14957 | RA 7235 | LAC 23              | Liberia     | <i>tropical japonica</i>  | WT             | <0.05 |
| 101 | IRGC 66756 | RA 7237 | Lemont              | USA         | <i>tropical japonica</i>  | WT             | <0.05 |
| 102 | IRGC 27762 | RA 7238 | Leung Pratew        | Thailand    | <i>temperate japonica</i> | WT             | <0.05 |
| 103 | IRGC 58286 | RA 7239 | Luk Takhar          | Afghanistan | <i>temperate japonica</i> | WT             | <0.05 |
| 105 | IRGC12883  | RA 7241 | Mehr                | Iran        | <i>aus</i>                | WT             | <0.05 |
| 107 | IRGC 25901 | RA 7243 | Miriti              | Bangladesh  | <i>tropical japonica</i>  | WT             | <0.05 |
| 108 | IRGC 12048 | RA 7244 | Moroberekan         | Guinea      | <i>tropical japonica</i>  | WT             | <0.05 |
| 110 | IRGC 6663  | RA 7246 | Mudgo               | India       | <i>indica</i>             | WT             | <0.05 |
| 111 | IRGC 6264  | RA 7247 | N 22                | India       | <i>tropical japonica</i>  | WT             | <0.05 |
| 112 | IRGC 6298  | RA 7248 | N12                 | India       | <i>Group V (aromatic)</i> | <i>badh2.1</i> | 0.47  |
| 113 | IRGC 418   | RA 7249 | NORIN 20            | Japan       | <i>temperate japonica</i> | WT             | <0.05 |
| 114 | Clor 9459  | RA 7250 | Nova                | USA         | <i>temperate japonica</i> | WT             | <0.05 |
| 115 | IRGC 38696 | RA 7251 | NPE 835             | Pakistan    | <i>temperate japonica</i> | WT             | <0.05 |
| 116 | IRGC 38698 | RA 7252 | NPE 844             | Pakistan    | <i>tropical japonica</i>  | WT             | <0.05 |
| 117 | IRGC 8179  | RA 7253 | O-LUEN-CHEUNG       | Taiwan      | <i>indica</i>             | WT             | <0.05 |
| 118 | PI 439118  | RA 7254 | Oro                 | Chile       | <i>temperate japonica</i> | WT             | <0.05 |
| 119 | PI 584668  | RA 7255 | Oryzica Llanos 5    | Colombia    | <i>indica</i>             | WT             | <0.05 |
| 120 | PI 458474  | RA 7256 | OS6                 | Nigeria     | <i>tropical japonica</i>  | WT             | <0.05 |
| 121 | Clor 8     | RA 7257 | Ostiglia            | Argentina   | <i>temperate japonica</i> | WT             | <0.05 |
| 122 | IRGC 8261  | RA 7258 | Padi Kasalle        | Indonesia   | <i>tropical japonica</i>  | WT             | <0.05 |
| 125 | IRGC 51400 | RA 7261 | Pao-Tou-Hung        | China       | <i>indica</i>             | WT             | <0.05 |
| 126 | IRGC 8268  | RA 7262 | Pappaku             | Taiwan      | <i>indica</i>             | WT             | N/A   |
| 128 | IRGC 5766  | RA 7264 | Pato De Gallinazo   | Australia   | <i>temperate japonica</i> | WT             | <0.05 |
| 129 | IRGC 8238  | RA 7265 | Peh-Kuh             | Taiwan      | <i>indica</i>             | WT             | <0.05 |
| 130 | IRGC 8237  | RA 7266 | Peh-Kuh-Tsao-Tu     | Taiwan      | <i>indica</i>             | WT             | <0.05 |
| 131 | IRGC 32399 | RA 7267 | Phudugey            | Bhutan      | <i>aus</i>                | WT             | <0.05 |
| 132 | IRGC 8952  | RA 7268 | Rathuwee            | Sri Lanka   | <i>indica</i>             | <i>badh2.1</i> | 0.29  |
| 134 | PI 433512  | RA 7270 | Romeo               | Italy       | <i>temperate japonica</i> | WT             | <0.05 |
| 135 | IRGC 15092 | RA 7271 | RT 1031-69          | Zaire       | <i>tropical japonica</i>  | WT             | <0.05 |
| 136 | IRGC 8234  | RA 7272 | RTS12               | Vietnam     | <i>indica</i>             | <i>badh2.1</i> | 0.46  |
| 137 | IRGC 8178  | RA 7273 | RTS14               | Vietnam     | <i>indica</i>             | WT             | <0.05 |
| 138 | IRGC 8177  | RA 7274 | RTS4                | Vietnam     | <i>indica</i>             | WT             | <0.05 |
| 139 | IRGC 1923  | RA 7275 | S4542A3-49B-2B12    | USA         | <i>tropical japonica</i>  | WT             | <0.05 |
| 140 | Clor 9540  | RA 7276 | Saturn              | USA         | <i>temperate japonica</i> | WT             | <0.05 |
| 141 | IRGC 8260  | RA 7277 | Seratoes Hari       | Indonesia   | <i>indica</i>             | WT             | <0.05 |
| 143 | Clor 1642  | RA 7279 | Shinriki            | Japan       | <i>temperate japonica</i> | WT             | <0.05 |
| 146 | IRGC 8242  | RA 7282 | Shuang-Chiang       | Taiwan      | <i>indica</i>             | WT             | N/A   |

|        |              |         |                               |              |                           |                |       |
|--------|--------------|---------|-------------------------------|--------------|---------------------------|----------------|-------|
| 147    | IRGC 3967    | RA 7283 | Sinampaga Selection           | Philippines  | <i>tropical japonica</i>  | WT             | <0.05 |
| 148    | IRGC 5418    | RA 7284 | Sintane Diofor                | Burkino Faso | <i>indica</i>             | WT             | <0.05 |
| 149    | Clor 3337    | RA 7285 | SINAGUING                     | Philippines  | <i>tropical japonica</i>  | WT             | <0.05 |
| 150    | Clor 1658    | RA 7286 | Sultani                       | Egypt        | <i>tropical japonica</i>  | WT             | <0.05 |
| 152    | IRGC 6294    | RA 7288 | T 1                           | India        | <i>aus</i>                | WT             | <0.05 |
| 154    | IRGC 1107    | RA 7290 | TA HUNG KU                    | China        | <i>temperate japonica</i> | WT             | <0.05 |
| 155    | IRGC 8194    | RA 7291 | Ta Mao Tsao                   | China        | <i>temperate japonica</i> | WT             | <0.05 |
| 156    | PI 271672    | RA 7292 | Taichung Native 1             | Taiwan       | <i>indica</i>             | WT             | <0.05 |
| 157    | PI 215936    | RA 7293 | Tainan Iku 487                | Taiwan       | <i>temperate japonica</i> | WT             | <0.05 |
| 158    | PI 366153    | RA 7294 | Taipei 309                    | Taiwan       | <i>temperate japonica</i> | WT             | <0.05 |
| 160    | IRGC 32362   | RA 7296 | Tchampa                       | Iran         | <i>Group V (aromatic)</i> | WT             | <0.05 |
| 161    | PI 536047    | RA 7297 | Teqing                        | China        | <i>indica</i>             | WT             | <0.05 |
| 162    | IRGC 237     | RA 7298 | TKM6                          | India        | <i>indica</i>             | WT             | <0.05 |
| 163    | PI 280681    | RA 7299 | Taducan                       | Philippines  | <i>indica</i>             | WT             | <0.05 |
| 164    | IRGC 3575    | RA 7300 | Tondok                        | Indonesia    | <i>tropical japonica</i>  | WT             | <0.05 |
| 165    | IRGC 43675   | RA 7301 | Trembese                      | Indonesia    | <i>tropical japonica</i>  | WT             | <0.05 |
| 167    | Clor 9881    | RA 7303 | B6616A4-22-Bk-5-4             | USA          | <i>tropical japonica</i>  | WT             | <0.05 |
| 169    | Clor 5309    | RA 7305 | WC 6                          | China        | <i>tropical japonica</i>  | <i>badh2.1</i> | 0.53  |
| 170    | PI 612439    | RA 7306 | Wells                         | USA          | <i>tropical japonica</i>  | WT             | <0.05 |
| 171    | PI 629016    | RA 7307 | Zhe 733                       | China        | <i>indica</i>             | WT             | <0.05 |
| 172    | PI 602624    | RA 7308 | Zhenshan 2                    | China        | <i>indica</i>             | WT             | <0.05 |
| 173    | IRGC 117274  | RA 7309 | Nipponbare                    | Japan        | <i>temperate japonica</i> | WT             | <0.05 |
| 174    | IRIS 2254730 | RA 7310 | Azucena                       | Philippines  | <i>tropical japonica</i>  | <i>badh2.1</i> | 0.31  |
| 391    | Clor 9483    | RA 7527 | Della                         | USA          | <i>tropical japonica</i>  | <i>badh2.1</i> | 1.43  |
|        | IRGC 52266   | RA 2221 | Ambemohar 1                   | India        | <i>Group V (aromatic)</i> | <i>badh2.1</i> | N/A   |
|        | IRGC 78469   | RA 2225 | Basmati Mehtrah               | India        | <i>Group V (aromatic)</i> | WT             | <0.05 |
|        | IRGC 79560   | RA 2226 | Basmati Bahar (shorter grain) | India        | <i>Group V (aromatic)</i> | <i>badh2.1</i> | 0.27  |
|        | IRGC 27815   | RA 2232 | Basmati 213                   | Pakistan     | <i>indica</i>             | WT             | N/A   |
|        | IRGC 27822   | RA 2237 | Basmati 370B                  | Pakistan     | <i>Group V (aromatic)</i> | WT             | N/A   |
|        |              | RA 2239 | Basmati 150                   | India        | <i>Group V (aromatic)</i> | WT             | N/A   |
|        | IRGC 53827   | RA 2248 | BPT1235                       | India        | <i>Group V (aromatic)</i> | <i>badh2.1</i> | N/A   |
|        |              | RA 2250 | Bogi Joha                     | India        | <i>indica</i>             | WT             | N/A   |
|        |              | RA 2253 | Barhail                       | India        | <i>Group V (aromatic)</i> | <i>badh2.1</i> | N/A   |
|        |              | RA 2254 | Blomberg                      | India        | <i>Group V (aromatic)</i> | <i>badh2.1</i> | N/A   |
|        | IRGC 45298   | RA 2258 | Chinisakkar                   | India        | <i>Group V (aromatic)</i> | <i>badh2.1</i> | N/A   |
|        | IRGC 43805   | RA 2259 | Chinigura                     | Bangladesh   | <i>Group V (aromatic)</i> | <i>badh2.1</i> | N/A   |
|        | IRGC 78476   | RA 2262 | Dulhamiya                     | India        | <i>Group V (aromatic)</i> | <i>badh2.1</i> | N/A   |
|        | IRGC 8628    | RA 2264 | DD66                          | Bangladesh   | <i>Group V (aromatic)</i> | <i>badh2.1</i> | N/A   |
| CCSHAU |              | RA 2271 | Haryana Basmati1              | India        | <i>Group V (aromatic)</i> | <i>badh2.1</i> | N/A   |
| CCSHAU |              | RA 2277 | HKR93-401                     | India        | <i>Group V (aromatic)</i> | <i>badh2.1</i> | N/A   |

|        |                 |         |                        |             |                           |                |       |
|--------|-----------------|---------|------------------------|-------------|---------------------------|----------------|-------|
| CCSHAU |                 | RA 2278 | Tararori Basmati       | India       | <i>Group V (aromatic)</i> | <i>badh2.1</i> | 0.68  |
|        | IRGC 78422      | RA 2279 | Pusa basmati-1         | India       | <i>Group V (aromatic)</i> | <i>badh2.1</i> | N/A   |
| CCSHAU |                 | RA 2280 | HBC-19                 | India       | <i>Group V (aromatic)</i> | <i>badh2.1</i> | N/A   |
|        | IRGC 27748      | RA 4878 | Khao Dawk Mali 105     | Thailand    | <i>indica</i>             | <i>badh2.1</i> | 1.21  |
|        | IRIS 2254721    | RA 4891 | FR13 A                 | India       | <i>aus</i>                | WT             | <0.05 |
|        | IRGC 27513      | RA 4984 | Dholi Boro             | Bangladesh  | <i>indica</i>             | WT             | <0.05 |
|        |                 | RA 5133 | IR64                   | Philippines | <i>indica</i>             | WT             | <0.05 |
| JP13   | collect in Indo | RA 5756 | P. Pulut Longbanga     | Indonesia   | <i>tropical japonica</i>  | <i>badh2.1</i> | N/A   |
| JP152  | collect in Indo | RA 5895 | P. Telengusan          | Indonesia   | <i>tropical japonica</i>  | <i>badh2.1</i> | N/A   |
| JP176  | collect in Indo | RA 5919 | P. Ciu                 | Indonesia   | <i>tropical japonica</i>  | <i>badh2.1</i> | N/A   |
| JP178  | collect in Indo | RA 5921 | P. Ikeng               | Indonesia   | <i>tropical japonica</i>  | <i>badh2.1</i> | N/A   |
| JP186  | collect in Indo | RA 5929 | P. Pampang             | Indonesia   | <i>indica</i>             | <i>badh2.1</i> | N/A   |
| JP187  | collect in Indo | RA 5930 | P. Gadis               | Indonesia   | <i>tropical japonica</i>  | <i>badh2.1</i> | N/A   |
| JP55   | collect in Indo | RA 5798 | P. Pulut Mbau          | Indonesia   | <i>tropical japonica</i>  | <i>badh2.1</i> | N/A   |
|        |                 | RA 8126 | Q74                    | Malaysia    | <i>indica</i>             | <i>badh2.1</i> | 0.70  |
|        |                 | RA 8127 | Nang Thom Cho Dao      | Vietnam     | <i>indica</i>             | <i>badh2.1</i> | 0.28  |
|        |                 | RA 8130 | RD33                   | Thailand    | <i>indica</i>             | <i>badh2.1</i> | 0.66  |
|        |                 | RA 8131 | PTT1                   | Thailand    | <i>indica</i>             | <i>badh2.1</i> | 0.21  |
|        |                 | RA 8132 | RD6                    | Thailand    | <i>indica</i>             | <i>badh2.1</i> | 0.43  |
|        |                 | RA 8135 | OM3536                 | Vietnam     | <i>indica</i>             | <i>badh2.1</i> | 0.34  |
|        |                 | RA 8136 | Basmati 2000           | Pakistan    | <i>Group V (aromatic)</i> | <i>badh2.1</i> | 0.26  |
|        |                 | RA 8141 | Nho Thom               | Vietnam     | <i>indica</i>             | <i>badh2.1</i> | 0.63  |
|        |                 | RA 8147 | Chao do                | Laos        | <i>indica</i>             | <i>badh2.1</i> | 0.19  |
|        |                 | RA 8155 | HNN                    | Laos        | <i>indica</i>             | <i>badh2.1</i> | 0.36  |
|        | IRGC 6148       | RA 8157 | AMBEMOHOR 157          | India       | <i>Group V (aromatic)</i> | <i>badh2.1</i> | 0.84  |
|        | IRGC 20310      | RA 8158 | ARC 6011               | India       | <i>Group V (aromatic)</i> | <i>badh2.1</i> | 1.13  |
|        | IRGC 27781      | RA 8159 | BARA 413               | Pakistan    | <i>Group V (aromatic)</i> | <i>badh2.1</i> | 0.89  |
|        | IRGC 29258      | RA 8160 | BASFUL 714             | Bangladesh  | <i>Group V (aromatic)</i> | <i>badh2.1</i> | 0.90  |
|        | IRGC 10330      | RA 8162 | BASMATI 6311           | Pakistan    | <i>Group V (aromatic)</i> | <i>badh2.1</i> | 1.41  |
|        | IRGC 9027       | RA 8163 | BASMATI C 622          | Pakistan    | <i>Group V (aromatic)</i> | <i>badh2.1</i> | 0.82  |
|        | IRGC 5857       | RA 8169 | DA13                   | Bangladesh  | <i>Group V (aromatic)</i> | <i>badh2.1</i> | 1.70  |
|        | IRGC 32291      | RA 8171 | DOMSIAH                | Iran        | <i>Group V (aromatic)</i> | <i>badh2.1</i> | 1.68  |
|        | IRGC 27953      | RA 8174 | HARANDI 379            | Pakistan    | <i>Group V (aromatic)</i> | <i>badh2.1</i> | 1.21  |
|        | IRGC 32329      | RA 8175 | SADRI                  | Iran        | <i>Group V (aromatic)</i> | <i>badh2.1</i> | 1.08  |
|        | IRGC 42736      | RA 8176 | ARC 13523              | India       | <i>Group V (aromatic)</i> | WT             | <0.05 |
|        | IRGC 20330      | RA 8177 | ARC 6070               | India       | <i>Group V (aromatic)</i> | WT             | <0.05 |
|        | IRGC 27856      | RA 8178 | BEGUMI 302             | Pakistan    | <i>Group V (aromatic)</i> | WT             | <0.05 |
|        | IRGC 32390      | RA 8181 | FARANGEY               | Bhutan      | <i>Group V (aromatic)</i> | WT             | <0.05 |
|        | IRGC 58288      | RA 8182 | MAHIN KUNDUZ           | Afghanistan | <i>Group V (aromatic)</i> | WT             | <0.05 |
|        | IRGC 4802       | RA 8183 | RANDHANIPAGAL(SCENTED) | China       | <i>temperate japonica</i> | WT             | <0.05 |

|             |         |                        |            |                    |         |       |
|-------------|---------|------------------------|------------|--------------------|---------|-------|
| IRGC 9026   | RA 8185 | BASMATI 370            | India      | Group V (aromatic) | badh2.1 | 0.87  |
| IRGC 32985  | RA 8186 | BOKEHMWE               | Myanmar    | indica             | badh2.1 | 1.60  |
| IRGC 16107  | RA 8187 | GUOR LAO               | Vietnam    | indica             | badh2.1 | 1.32  |
| IRGC 9092   | RA 8188 | JC220                  | India      | Group V (aromatic) | badh2.1 | 0.47  |
| IRGC 33357  | RA 8189 | MA WAINE OHN           | Myanmar    | indica             | badh2.1 | 1.00  |
| IRGC 33571  | RA 8191 | PAWSANHMWE             | Myanmar    | indica             | badh2.1 | 1.41  |
| IRGC 78747  | RA 8193 | TAINUNG SEN 20         | Taiwan     | indica             | badh2.1 | 0.68  |
| IRGC 233103 | RA 8195 | Aus Basmati            | India      | Group V (aromatic) | badh2.1 | 0.43  |
| IRGC 385453 | RA 8200 | Basmati 410            | India      | Group V (aromatic) | badh2.1 | 0.63  |
| IRGC 385785 | RA 8201 | Basmati Lal            | Pakistan   | Group V (aromatic) | badh2.1 | N/A   |
| IRGC 412772 | RA 8206 | Basmati 802            | Pakistan   | Group V (aromatic) | badh2.1 | 1.21  |
| IRGC 412852 | RA 8208 | Karnal Basmati         | Pakistan   | Group V (aromatic) | badh2.1 | N/A   |
| IRGC 584591 | RA 8222 | YUN AROMATIC GLUTINOUS | China      | indica             | badh2.1 | N/A   |
| IRGC 595927 | RA 8224 | JASMINE 85             | USA        | indica             | badh2.1 | 0.38  |
| GSOR 310319 | RA 8230 | BC5-55                 | India      | indica             | badh2.1 | N/A   |
| GSOR 311134 | RA 8231 | Sathi Basmati          | Pakistan   | Group V (aromatic) | badh2.1 | 0.44  |
| GSOR 311216 | RA 8232 | Basmati 802            | Pakistan   | Group V (aromatic) | badh2.1 | 1.21  |
| IRGC 77952  | RA 8362 | Bidor                  | Malaysia   | tropical japonica  | badh2.1 | N/A   |
| IRGC 77954  | RA 8364 | Coreng                 | Malaysia   | tropical japonica  | badh2.1 | N/A   |
| IRGC 115287 | RA 8395 | Ble Ma Mua             | Vietnam    | tropical japonica  | WT      | N/A   |
| IRGC 9877   | RA 8503 | Kalijira               | Bangladesh | Group V (aromatic) | badh2.1 | 0.20  |
| IRGC 66247  | RA 8514 | Sadri Ghermes          | Iran       | Group V (aromatic) | badh2.1 | N/A   |
| IRGC 78480  | RA 8516 | Jasmine Scented        | Thailand   | indica             | badh2.1 | 0.84  |
| IRGC 87902  | RA 8521 | Somaly Krar-oob        | Cambodia   | indica             | badh2.1 | N/A   |
| IRGC 27798  | F14     | Basmati 1_IRRI         | Pakistan   | Group V (aromatic) | badh2.1 | 0.73  |
| IRGC 27815  | F16     | Basmati 213_IRRI       | Pakistan   | Group V (aromatic) | badh2.1 | 0.26  |
| IRGC 27819  | F17     | Basmati 334_IRRI       | Pakistan   | Group V (aromatic) | WT      | <0.05 |
| IRGC 27822  | F18     | Basmati 370B_IRRI      | Pakistan   | Group V (aromatic) | badh2.1 | 0.73  |
| IRGC 27824  | F19     | Basmati 372A_IRRI      | Pakistan   | Group V (aromatic) | badh2.1 | 0.67  |
| IRGC 27869  | F20     | Chahora 144_IRRI       | Pakistan   | Group V (aromatic) | badh2.1 | 0.39  |
| IRGC 30238  | F21     | Champa Tong 54_IRRI    | Thailand   | indica             | badh2.1 | 0.27  |
| IRGC 9091   | F3      | JC1_IRRI               | India      | Group V (aromatic) | badh2.1 | 0.91  |
| IRGC 78470  | F33     | Basmati sathi_IRRI     | India      | Group V (aromatic) | badh2.1 | 0.35  |
| IRGC 5999   | F38     | Pankhari 203_IRRI      | India      | Group V (aromatic) | badh2.1 | 0.46  |
| IRGC 7937   | F4      | Pratao_IRRI            | Brazil     | indica             | WT      | <0.05 |
| IRGC 42469  | F58     | ARC 13829_IRRI         | India      | Group V (aromatic) | WT      | <0.05 |
| IRGC 9036   | F61     | Basmati 6113_IRRI      | Pakistan   | Group V (aromatic) | badh2.1 | 0.40  |
| IRGC 9030   | F63     | Basmati 5836_IRRI      | Pakistan   | Group V (aromatic) | badh2.1 | 0.73  |
| IRGC 27805  | F75     | Basmati 122_IRRI       | Pakistan   | Group V (aromatic) | badh2.1 | 0.16  |
| IRGC 58930  | F79     | Chhote Dhan_IRRI       | Nepal      | Group V (aromatic) | WT      | <0.05 |

|            |      |                      |            |                           |    |       |
|------------|------|----------------------|------------|---------------------------|----|-------|
| IRGC 78469 | F80  | Basmati mehtrah_IRRI | India      | <i>Group V (aromatic)</i> | WT | <0.05 |
| IRGC 6245  | AUS1 | DA16                 | Bangladesh | <i>aus</i>                | WT | N/A   |
| IRGC 6307  | AUS2 | JHONA 349            | India      | <i>aus</i>                | WT | <0.05 |
| IRGC 6422  | AUS3 | DA8                  | Bangladesh | <i>aus</i>                | WT | N/A   |
| IRGC 7702  | AUS4 | KALUBALA VEE         | Sri Lanka  | <i>aus</i>                | WT | N/A   |
| IRGC 9069  | AUS5 | JC148                | India      | <i>aus</i>                | WT | N/A   |
| IRGC 25835 | AUS6 | BAILAM               | Bangladesh | <i>aus</i>                | WT | N/A   |
| IRGC 25852 | AUS7 | DUMAI                | Bangladesh | <i>aus</i>                | WT | N/A   |
| IRGC 32300 | AUS8 | GERDEH               | Iran       | <i>aus</i>                | WT | N/A   |
| IRGC 34712 | AUS9 | LAKHI PURI           | Bangladesh | <i>aus</i>                | WT | N/A   |

### Fragrant Accessions Lacking Known Derived *BADH2* Alleles:

| Code  | Gene Bank # | Cornell RA # | Accession Name         | Country of Origin | Subpopulation             | <i>BADH2</i> allele | [2AP] |
|-------|-------------|--------------|------------------------|-------------------|---------------------------|---------------------|-------|
| ANF4  | IRGC 28473  | RA 8203      | HSIANG-KENG-NUO        | China             | <i>tropical japonica</i>  | <i>badh2.2</i>      | 0.66  |
| ANF10 | IRGC 69874  | RA 8515      | RASOMOTRAFOTSY         | Madagascar        | <i>tropical japonica</i>  | <i>badh2.3</i>      | 0.74  |
| ANF3  | IRGC 27348  | RA 8507      | PARE BAINE PULUT       | Indonesia         | <i>tropical japonica</i>  | <i>badh2.4</i>      | 0.59  |
| ANF9  | IRGC 52787  | RA 8513      | VISHUNPARAG            | India             | <i>aus</i>                | <i>badh2.5</i>      | 0.41  |
| ANF1  | IRGC 13453  | RA 8505      | PADI WANGI             | Malaysia          | <i>indica</i>             | <i>badh2.6</i>      | 0.70  |
| ANF6  | IRGC 34975  | RA 8510      | KATAK TARA             | India             | <i>aus</i>                | <i>badh2.7</i>      | 0.37  |
| ANF7  | IRGC 36394  | RA 8511      | SUWANDA AL             | Sri Lanka         | <i>aus</i>                | <i>badh2.7</i>      | 0.30  |
| ANF8  | IRGC 44204  | RA 8512      | UPRB28                 | India             | <i>aus</i>                | <i>badh2.7</i>      | 0.42  |
| ANF11 | IRGC 82408  | RA 8518      | BASMATI BAHAR(L-GRAIN) | India             | <i>aus</i>                | <i>badh2.7</i>      | 0.38  |
| ANF12 | IRGC 83308  | RA 8519      | BASMATI                | Nepal             | <i>aus</i>                | <i>badh2.7</i>      | 0.32  |
| ANF13 | IRGC 83309  | RA 8520      | BASMATI                | Nepal             | <i>aus</i>                | <i>badh2.7</i>      | 0.77  |
| ANF5  | IRGC 33858  | RA 8509      | YANGON SABA            | Myanmar           | <i>Group V (aromatic)</i> | <i>badh2.8</i>      | 0.31  |
| F22   | IRGC 32960  | RA 8508      | Balugyun_IRRI          | Myanmar           | <i>Group V (aromatic)</i> | <i>badh2.8</i>      | 0.42  |
| SR5   | IRGC 97793  | RA 8524      | Paw San Hmwe_IRRI      | Myanmar           | <i>Group V (aromatic)</i> | <i>badh2.8</i>      | 0.43  |
|       |             |              | Paw San Hmwe_METAPHOR  | Myanmar           |                           | <i>badh2.8</i>      | 0.49  |
|       | IRGC 33064  | RA 8172      | EMATA LONGYU           | Myanmar           | <i>Group V (aromatic)</i> | <i>badh2.8</i>      | 0.14  |
| ANF2  | IRGC 18438  | RA 8506      | PANDAN WANGI           | Indonesia         | <i>tropical japonica</i>  | <i>badh2.9</i>      | 0.29  |
| PW1   | N/A         | DNA only     | Pandan Wangi           | Indonesia         | <i>tropical japonica</i>  | <i>badh2.9</i>      | 0.19  |
| SR8   | N/A         | DNA only     | Pandan Wangi           | Indonesia         | <i>tropical japonica</i>  | <i>badh2.9</i>      | 0.14  |
| SR9   | N/A         | DNA only     | Pandan Wangi           | Indonesia         | <i>tropical japonica</i>  | <i>badh2.9</i>      | 0.18  |
|       | IRGC 79569  | RA 8517      | Mentik Wangi           | Indonesia         | <i>tropical japonica</i>  | <i>badh2.9</i>      | N/A   |
|       |             | RA 8151      | Pandan Wangi8          | Indonesia         | <i>tropical japonica</i>  | <i>badh2.9</i>      | 0.08  |
|       | IRGC 78746  | RA 8192      | TAINUNG 72             | Taiwan            | <i>tropical japonica</i>  | <i>badh2.10</i>     | 0.35  |
|       | IRGC 439612 | RA 8215      | Shiratama              | Japan             | <i>tropical japonica</i>  | <i>badh2.10</i>     | N/A   |
| ANF14 | IRGC 90687  | RA 8522      | KHAU TAN LUONG         | Vietnam           | <i>tropical japonica</i>  | WT                  | 0.79  |
|       | LG6732      | RA 8156/K2   | Kai Noi Leuang         | Laos              | <i>tropical japonica</i>  | WT                  | 0.76  |
