# Supplementary material
Source: PubMed Central journal article supplement (PMC2732888)
Supplement: 0904077106_ST2_PDF.pdf [file 0904077106_ST2_PDF.pdf]

|     |                    |                   |             |      |   |        |   |   |   |   |   |   |   |   |   |   |   |   |   |   |     |   |   |   |   |   |    |   |   |   |   |   |   |   |   |   |   |   |   |   |   |   |   |   |   |   |   |   |   |   |   |   |   |   |   |   |   |   |   |   |   |
|-----|--------------------|-------------------|-------------|------|---|--------|---|---|---|---|---|---|---|---|---|---|---|---|---|---|-----|---|---|---|---|---|----|---|---|---|---|---|---|---|---|---|---|---|---|---|---|---|---|---|---|---|---|---|---|---|---|---|---|---|---|---|---|---|---|---|---|
| 71  | Q74                | indica            |             | 8126 | 2 | Jap_GH | T | G | 1 | C | 0 | 5 | C | A | A | G | C | C | T | G | T   | 2 | C | T | A | 0 | 23 | C | T | T | T | C | C | T | T | 4 | C | G | A | T | T | 8 | T | A | C | A | G | C | G | T | T | C | T | T | A | C | C | 4 | 0 | 0 | C |
| 72  | P. Ciu             | indica            |             | J186 | 2 | Jap_GH | T | G | 1 | C | 0 | 5 | C | A | A | G | C | C | T | G | T   | 2 | C | T | A | 0 | 23 | C | T | T | T | C | C | T | T | 4 | C | G | A | T | T | 8 | T | A | C | A | G | C | G | T | T | C | T | T | A | C | C | 4 | 0 | 0 | C |
| 73  | Champa tong 54     | indica            | IRGC 30238  | F21  | 2 | Jap_GH | T | G | 1 | C | 0 | 5 | C | A | A | G | C | C | T | G | T   | 2 | C | T | A | 0 | 23 | C | T | T | T | C | C | T | T | 4 | C | G | A | T | T | 8 | T | A | C | A | G | C | G | T | T | C | T | T | A | C | C | 4 | 0 | 0 | C |
| 74  | Rathuwee           | indica            | IRGC 8952   | 132  | 2 | Jap_GH | T | G | 1 | C | 0 | 5 | C | A | A | G | C | C | T | G | T   | 2 | C | T | A | 0 | 23 | C | T | T | T | C | C | T | T | 4 | C | G | A | T | T | 8 | T | A | C | A | G | C | G | T | T | C | T | T | A | C | C | 4 | 0 | 0 | C |
| 75  | BOKEHMWE           | indica            | IRGC 32985  | 8186 | 2 | Jap_GH | T | G | 1 | C | 0 | 5 | C | A | A | G | C | C | T | G | T   | 2 | C | T | A | 0 | 23 | C | T | T | T | C | C | T | T | 4 | C | G | A | T | T | 8 | T | A | C | A | G | C | G | T | T | C | T | T | A | C | C | 4 | 0 | 0 | C |
| 76  | Khao Dawk Mali 105 | indica            | IRGC 27748  | 4878 | 2 | Jap_GH | T | G | 1 | C | 0 | 5 | C | A | A | G | C | C | T | G | T   | 2 | C | T | A | 0 | 23 | C | T | T | T | C | C | T | T | 4 | C | G | A | T | T | 8 | T | A | C | A | G | C | G | T | T | C | T | T | A | C | C | 4 | 0 | 0 | C |
| 77  | JASMINE 85         | indica            | IRGC 595927 | 8224 | 2 | Jap_GH | T | G | 1 | C | 0 | 5 | C | A | A | G | C | C | T | G | T   | 2 | C | T | A | 0 | 23 | C | T | T | T | C | C | T | T | 4 | C | G | A | T | T | 8 | T | A | C | A | G | C | G | T | T | C | T | T | A | C | C | 4 | 0 | 0 | C |
| 78  | TAINUNG SEN 20     | indica            | IRGC 78747  | 8193 | 2 | Jap_GH | T | G | 1 | C | 0 | 5 | C | A | A | G | C | C | T | G | T   | 2 | C | T | A | 0 | 23 | C | T | T | T | C | C | T | T | 4 | C | G | A | T | T | 8 | T | A | C | A | G | C | G | T | T | C | T | T | A | C | C | 4 | 0 | 0 | C |
| 79  | Nho Thom           | indica            |             | 8141 | 2 | Jap_GH | T | G | 1 | C | 0 | 5 | C | A | A | G | C | C | T | G | T   | 2 | C | T | A | 0 | 23 | C | T | T | T | C | C | T | T | 4 | C | G | A | T | T | 8 | T | A | C | A | G | C | G | T | T | C | T | T | A | C | C | 4 | 0 | 0 | C |
| 80  | RD33               | indica            |             | 8130 | 2 | Jap_GH | T | G | 1 | C | 0 | 5 | C | A | A | G | C | C | T | G | T   | 2 | C | T | A | 0 | 23 | C | T | T | T | C | C | T | T | 4 | C | G | A | T | T | 8 | T | A | C | A | G | C | G | T | T | C | T | T | A | C | C | 4 | 0 | 0 | C |
| 81  | RD6                | indica            |             | 8132 | 2 | Jap_GH | T | G | 1 | C | 0 | 5 | C | A | A | G | C | C | T | G | T   | 2 | C | T | A | 0 | 23 | C | T | T | T | C | C | T | T | 4 | C | G | A | T | T | 8 | T | A | C | A | G | C | G | T | T | C | T | T | A | C | C | 4 | 0 | 0 | C |
| 82  | OM3536             | indica            |             | 8135 | 2 | Jap_GH | T | G | 1 | C | 0 | 5 | C | A | A | G | C | C | T | G | T   | 2 | C | T | A | 0 | 23 | C | T | T | T | C | C | T | T | 4 | C | G | A | T | T | 8 | T | A | C | A | G | C | G | T | T | C | T | T | A | C | C | 4 | 0 | 0 | C |
| 83  | P. Gadis           | tropical japonica |             | J55  | 2 | Jap_GH | T | G | 1 | C | 0 | 5 | C | A | A | G | C | C | T | G | T   | 2 | C | T | A | 0 | 23 | C | T | T | T | C | C | T | T | 4 | C | G | A | T | T | 8 | T | A | C | A | G | C | G | T | T | C | T | T | A | C | C | 4 | 0 | 0 | C |
| 84  | P. Pulut Mbau      | tropical japonica |             | J176 | 2 | Jap_GH | T | G | 1 | C | 0 | 5 | C | A | A | G | C | C | T | G | T   | 2 | C | T | A | 0 | 23 | C | T | T | T | C | C | T | T | 4 | C | G | A | T | T | 8 | T | A | C | A | G | C | G | T | T | C | T | T | A | C | C | 4 | 0 | 0 | C |
| 85  | Ambemohar 1        | Group V           | IRGC 52266  | 2221 | 2 | Jap_GH | T | G | 1 | C | 0 | 5 | C | A | A | G | C | C | T | G | T   | 2 | C | T | A | 0 | 23 | C | T | T | T | C | C | T | T | 6 | C | G | A | T | T | 8 | T | A | C | A | G | C | G | T | T | C | T | T | A | C | C | 4 | 0 | 0 | C |
| 86  | JC220              | Group V           | IRGC 9092   | 8188 | 2 | Jap_GH | T | G | 1 | C | 0 | 5 | C | A | A | G | C | C | T | G | T   | 2 | C | T | A | 0 | 23 | C | T | T | T | C | C | T | T | 6 | C | G | A | T | T | 8 | T | A | C | A | G | C | G | T | T | C | T | T | A | C | C | 4 | 0 | 0 | C |
| 87  | AMBEMOHOR 157      | Group V           | IRGC 6148   | 8157 | 2 | Jap_GH | T | G | 1 | C | 0 | 5 | C | A | A | G | C | C | T | G | T   | 2 | C | T | A | 0 | 23 | C | T | T | T | C | C | T | T | 6 | C | G | A | T | T | 8 | T | A | C | A | G | C | G | T | T | C | T | T | A | C | C | 4 | 0 | 0 | C |
| 88  | Sadri Ghermes      | Group V           | IRGC 66247  | 8514 | 2 | Jap_GH | T | G | 1 | C | 0 | 5 | C | A | A | G | C | C | T | G | T   | 2 | C | T | A | 0 | 23 | C | T | T | T | C | C | T | T | 6 | C | G | A | T | T | 8 | T | A | C | A | G | C | G | T | T | C | T | T | A | C | C | 4 | 0 | 0 | C |
| 89  | Gerdeh             | Group V           | IRGC 32300  | 55   | 2 | Jap_GH | T | G | 1 | C | 0 | 5 | C | A | A | G | C | C | T | G | T   | 2 | C | T | A | 0 | 23 | C | T | T | T | C | C | T | T | 6 | C | G | A | T | T | 8 | T | A | C | A | G | C | G | T | T | C | T | T | A | C | C | 4 | 0 | 0 | C |
| 90  | Basmati bahar      | Group V           | IRGC 79560  | 2226 | 2 | Jap_GH | T | G | 1 | C | 0 | 5 | C | A | A | G | C | C | T | G | T   | 2 | C | T | A | 0 | 23 | C | T | T | T | C | C | T | T | 6 | C | G | A | T | T | 8 | T | A | C | A | G | C | G | T | T | C | T | T | A | C | C | 4 | 0 | 0 | C |
| 91  | ARC 6011           | Group V           | IRGC 20310  | 8158 | 2 | Jap_GH | T | G | 1 | C | 0 | 5 | C | A | A | G | C | C | T | G | T   | 2 | C | T | A | 0 | 23 | C | T | T | T | C | C | T | T | 6 | C | G | A | T | T | 8 | T | A | C | A | G | C | G | T | T | C | T | T | A | C | C | 4 | 0 | 0 | C |
| 92  | Basmati 6113       | Group V           | IRGC 9036   | F61  | 2 | Jap_GH | T | G | 1 | C | 0 | 5 | C | A | A | G | C | C | T | G | T   | 2 | C | T | A | 0 | 23 | C | T | T | T | C | C | T | T | 6 | C | G | A | T | T | 8 | T | A | C | A | G | C | G | T | T | C | T | T | A | C | C | 4 | 0 | 0 | C |
| 93  | SADRI              | Group V           | IRGC 32329  | 8175 | 2 | Jap_GH | T | G | 1 | C | 0 | 5 | C | A | A | G | C | C | T | G | T   | 2 | C | T | A | 0 | 23 | C | T | T | T | C | C | T | T | 6 | C | G | A | T | T | 8 | T | A | C | A | G | C | G | T | T | C | T | T | A | C | C | 4 | 0 | 0 | C |
| 94  | ARC 10352          | Group V           | IRGC 12440  | 5    | 2 | Jap_GH | T | G | 1 | C | 0 | 5 | C | A | A | G | C | C | T | G | T   | 2 | C | T | A | 0 | 23 | C | T | T | T | C | C | T | T | 6 | C | G | A | T | T | 8 | T | A | C | A | G | C | G | T | T | C | T | T | A | C | C | 4 | 0 | 0 | C |
| 95  | Dulhemiya          | Group V           | IRGC 78476  | 2262 | 2 | Jap_GH | T | G | 1 | C | 0 | 5 | C | A | A | G | C | C | T | G | T   | 2 | C | T | A | 0 | 23 | C | T | T | T | C | C | T | T | 6 | C | G | A | T | T | 8 | T | A | C | A | G | C | G | T | T | C | T | T | A | C | C | 4 | 0 | 0 | C |
| 96  | DOMSIAH            | Group V           | IRGC 32291  | 8171 | 2 | Jap_GH | T | G | 1 | C | 0 | 5 | C | A | A | G | C | C | T | G | T   | 2 | C | T | A | 0 | 23 | C | T | T | T | C | C | T | T | 6 | C | G | A | T | T | 8 | T | A | C | A | G | C | G | T | T | C | T | T | A | C | C | 4 | 0 | 0 | C |
| 97  | DA13               | Group V           | IRGC 5857   | 8169 | 2 | Jap_GH | T | G | 1 | C | 0 | 5 | C | A | A | G | C | C | T | G | T   | 2 | C | T | A | 0 | 23 | C | T | T | T | C | C | T | T | 6 | C | G | A | T | T | 8 | T | A | C | A | G | C | G | T | T | C | T | T | A | C | C | 4 | 0 | 0 | C |
| 98  | Kaljira            | Group V           | IRGC 9877   | 8503 | 2 | Jap_GH | T | G | 1 | C | 0 | 5 | C | A | A | G | C | C | T | G | T   | 2 | C | T | A | 0 | 23 | C | T | T | T | C | C | T | T | 6 | C | G | A | T | T | 8 | T | A | C | A | G | C | G | T | T | C | T | T | A | C | C | 4 | 0 | 0 | C |
| 99  | Pankhari 203       | Group V           | IRGC 5999   | F38  | 2 | Jap_GH | T | G | 1 | C | 0 | 5 | C | A | A | G | C | C | T | G | T   | 2 | C | T | A | 0 | 23 | C | T | T | T | C | C | T | T | 6 | C | G | A | T | T | 8 | T | A | C | A | G | C | G | T | T | C | T | T | A | C | C | 4 | 0 | 0 | C |
| 100 | DOM-SOFID          | Group V           | PI 584607   | 45   | 2 | Jap_GH | T | G | 1 | C | 0 | 5 | C | A | A | G | C | C | T | G | T   | 2 | C | T | A | 0 | 23 | C | T | T | T | C | C | T | T | 6 | C | G | A | T | T | 8 | T | A | C | A | G | C | G | T | T | C | T | T | A | C | C | 4 | 0 | 0 | C |
| 101 | Basmati 1          | Group V           | IRGC 27798  | F14  | 2 | Jap_GH | T | G | 1 | C | 0 | 5 | C | A | A | G | C | C | T | G | T   | 2 | C | T | A | 0 | 23 | C | T | T | T | C | C | T | T | 6 | C | G | A | T | T | 8 | T | A | C | A | G | C | G | T | T | C | T | T | A | C | C | 4 | 0 | 0 | C |
| 102 | Basmati 217        | Group V           | IRGC 53637  | 14   | 2 | Jap_GH | T | G | 1 | C | 0 | 5 | C | A | A | G | C | C | T | G | T   | 2 | C | T | A | 0 | 23 | C | T | T | T | C | C | T | T | 6 | C | G | A | T | T | 8 | T | A | C | A | G | C | G | T | T | C | T | T | A | C | C | 4 | 0 | 0 | C |
| 103 | Basmati 213        | Group V           | IRGC 27815  | F16  | 2 | Jap_GH | T | G | 1 | C | 0 | 5 | C | A | A | G | C | C | T | G | T   | 2 | C | T | A | 0 | 23 | C | T | T | T | C | C | T | T | 6 | C | G | A | T | T | 8 | T | A | C | A | G | C | G | T | T | C | T | T | A | C | C | 4 | 0 | 0 | C |
| 104 | Basmati 370B       | Group V           | IRGC 27822  | F18  | 2 | Jap_GH | T | G | 1 | C | 0 | 5 | C | A | A | G | C | C | T | G | T   | 2 | C | T | A | 0 | 23 | C | T | T | T | C | C | T | T | 6 | C | G | A | T | T | 8 | T | A | C | A | G | C | G | T | T | C | T | T | A | C | C | 4 | 0 | 0 | C |
| 105 | Basmati sathi      | Group V           | IRGC 78470  | F33  | 2 | Jap_GH | T | G | 1 | C | 0 | 5 | C | A | A | G | C | C | T | G | T   | 2 | C | T | A | 0 | 23 | C | T | T | T | C | C | T | T | 6 | C | G | A | T | T | 8 | T | A | C | A | G | C | G | T | T | C | T | T | A | C | C | 4 | 0 | 0 | C |
| 106 | Kitrana 508        | Group V           | IRGC 12793  | 93   | 2 | Jap_GH | T | G | 1 | C | 0 | 5 | C | A | A | G | C | C | T | G | T</ |   |   |   |   |   |    |   |   |   |   |   |   |   |   |   |   |   |   |   |   |   |   |   |   |   |   |   |   |   |   |   |   |   |   |   |   |   |   |   |   |

|     |                       |                    |            |      |   |        |                                                                                                               |
|-----|-----------------------|--------------------|------------|------|---|--------|---------------------------------------------------------------------------------------------------------------|
| 150 | Gharib                | indica             | IRGC 32303 | 57   | 4 | Ind_GH | G A 1 C 1 5 A C C G C G T G C 0 T C T 3 23 G A T T C C A T 14 C G G A A 0 C A C A A G G C T C T T A C C 4 0 C |
| 151 | Pappaku               | indica             | IRGC 8268  | 126  | 4 | Ind_GH | G A 1 C 0 5 A C C G C G T G C 0 T C T 3 23 G A T T C C A T 14 C G G A A 0 C A C A A G G C T C T T A C C 4 0 C |
| 152 | JC149                 | indica             | IRGC 9070  | 77   | 4 | Ind_GH | G A 1 C 1 5 A C C G C G T G C 0 T C T 3 23 G A T T C C A T 14 C G G A A 0 C A C A A G G C T C T T A C C 4 0 C |
| 153 | Chau                  | indica             | IRGC 56036 | 29   | 4 | Ind_GH | G A 1 C 1 5 A C C G C G T G C 0 T C T 3 23 G A T T C C A T 14 C G G A A 0 C A C A A G G C T C T T A C C 4 0 C |
| 154 | Zhe 733               | indica             | PI 629016  | 171  | 4 | Ind_GH | G A 1 C 1 5 A C C G C G T G C 0 T C T 3 23 G A T T C C A T 14 C G G A A 0 C A C A A G G C T C T T A C C 4 0 C |
| 155 | Guan-Yin-Tean         | indica             | IRGC 51300 | 61   | 4 | Ind_GH | G A 1 C 1 5 A C C G C G T G C 0 T C T 3 23 G A T T C C A T 14 C G G A A 0 C A C A A G G C T C T T A C C 4 0 C |
| 156 | Kiang-Chou-Chiu       | indica             | IRGC 8180  | 90   | 4 | Ind_GH | G A 1 C 1 5 A C C G C G T G C 0 T C T 3 23 G A T T C C A T 14 C G G A A 0 C A C A A G G C T C T T A C C 4 0 C |
| 157 | O-LUEN-CHEUNG         | indica             | IRGC 8179  | 117  | 4 | Ind_GH | G A 1 C 1 5 A C C G C G T G C 0 T C T 3 23 G A T T C C A T 14 C G G A A 0 C A C A A G G C T C T T A C C 4 0 C |
| 158 | Dee Geo Woo Gen       | indica             | PI 279131  | 43   | 4 | Ind_GH | G A 1 C 1 5 A C C G C G T G C 0 T C T 3 23 G A T T C C A T 14 C G G A A 0 C A C A A G G C T C T T A C C 4 0 C |
| 159 | Peh-Kuh-Tsao-Tu       | indica             | IRGC 8237  | 130  | 4 | Ind_GH | G A 1 C 1 5 A C C G C G T G C 0 T C T 3 23 G A T T C C A T 14 C G G A A 0 C A C A A G G C T C T T A C C 4 0 C |
| 160 | Taichung Native 1     | indica             | PI 271672  | 156  | 4 | Ind_GH | G A 1 C 1 5 A C C G C G T G C 0 T C T 3 23 G A T T C C A T 14 C G G A A 0 C A C A A G G C T C T T A C C 4 0 C |
| 161 | Teqing                | indica             | PI 536047  | 161  | 4 | Ind_GH | G A 1 C 1 5 A C C G C G T G C 0 T C T 3 23 G A T T C C A T 14 C G G A A 0 C A C A A G G C T C T T A C C 4 0 C |
| 162 | Jaya                  | indica             | IRGC 11099 | 76   | 4 | Ind_GH | G A 1 C 1 5 A C C G C G T G C 0 T C T 3 23 G A T T C C A T 14 C G G A A 0 C A C A A G G C T C T T A C C 4 0 C |
| 163 | Basmati 213           | indica             | IRGC 27815 | 2232 | 4 | Ind_GH | G A 1 C 1 5 A C C G C G T G C 0 T C T 3 23 G A T T C C A T 14 C G G A A 0 C A C A A G G C T C T T A C C 4 0 C |
| 164 | Binulawan             | indica             | IRGC 26872 | 17   | 4 | Ind_GH | G A 1 C 1 5 A C C G C G T G C 0 T C T 3 23 G A T T C C A T 14 C G G A A 0 C A C A A G G C T C T T A C C 4 0 C |
| 165 | IR 8                  | indica             | PI 312627  | 72   | 4 | Ind_GH | G A 1 C 1 5 A C C G C G T G C 0 T C T 3 23 G A T T C C A T 14 C G G A A 0 C A C A A G G C T C T T A C C 4 0 C |
| 166 | IR64                  | indica             | PI 5133    | 4    | 4 | Ind_GH | G A 1 C 1 5 A C C G C G T G C 0 T C T 3 23 G A T T C C A T 14 C G G A A 0 C A C A A G G C T C T T A C C 4 0 C |
| 167 | RTS14                 | indica             | IRGC 8178  | 137  | 4 | Ind_GH | G A 1 C 1 5 A C C G C G T G C 0 T C T 3 23 G A T T C C A T 14 C G G A A 0 C A C A A G G C T C T T A C C 4 0 C |
| 168 | Oryzica Llanos 5      | indica             | PI 584668  | 119  | 4 | Ind_GH | G A 1 C 1 5 A C C G C G T G C 0 T C T 3 23 G A T T C C A T 14 C G G A A 0 C A C A A G G C T C T T A C C 4 0 C |
| 169 | Seratoes Hari         | indica             | IRGC 8260  | 141  | 4 | Ind_GH | G A 1 C 1 5 A C C G C G T G C 0 T C T 3 23 G A T T C C A T 14 C G G A A 0 C A C A A G G C T C T T A C C 4 0 C |
| 170 | Sintane Dioror        | indica             | IRGC 5418  | 148  | 4 | Ind_GH | G A 1 C 1 5 A C C G C G T G C 0 T C T 3 23 G A T T C C A T 14 C G G A A 0 C A C A A G G C T C T T A C C 4 0 C |
| 171 | Zhenshan 2            | indica             | PI 602624  | 172  | 4 | Ind_GH | G A 1 C 1 5 A C C G C G T G C 0 T C T 3 23 G A T T C C A T 14 C G G A A 0 C A C A A G G C T C T T A C C 4 0 C |
| 172 | Pao-Tou-Hung          | indica             | IRGC 51400 | 125  | 4 | Ind_GH | G A 1 C 1 5 A C C G C G T G C 0 T C T 3 23 G A T T C C A T 14 C G G A A 0 C A C A A G G C T C T T A C C 4 0 C |
| 173 | Ai-Chiao-Hong         | indica             | IRGC 51250 | 3    | 4 | Ind_GH | G A 1 C 1 5 A C C G C G T G C 0 T C T 3 23 G A T T C C A T 14 C G G A A 0 C A C A A G G C T C T T A C C 4 0 C |
| 174 | Peh-Kuh               | indica             | IRGC 8238  | 129  | 4 | Ind_GH | G A 1 C 1 5 A C C G C G T G C 0 T C T 3 23 G A T T C C A T 14 C G G A A 0 C A C A A G G C T C T T A C C 4 0 C |
| 175 | Dholi Boro            | indica             | IRGC 27513 | 4984 | 4 | Ind_GH | G A 1 C 1 5 A C C G C G T G C 0 T C T 3 23 G A T T C C A T 14 C G G A A 0 C A C A A G G C T C T T A C C 4 0 C |
| 176 | Pratao                | indica             | IRGC 7937  | F4   | 4 | Ind_GH | G A 1 C 1 5 A C C G C G T G C 0 T C T 3 23 G A T T C C A T 14 C G G A A 0 C A C A A G G C T C T T A C C 4 0 C |
| 177 | Bogi Joha             | indica             | PI 2250    | 4    | 4 | Ind_GH | G A 1 C 1 5 A C C G C G T G C 0 T C T 3 23 G A T T C C A T 14 C G G A A 0 C A C A A G G C T C T T A C C 4 0 C |
| 178 | Mudgo                 | indica             | IRGC 6663  | 110  | 4 | Ind_GH | G A 1 C 1 5 A C C G C G T G C 0 T C T 3 23 G A T T C C A T 14 C G G A A 0 C A C A A G G C T C T T A C C 4 0 C |
| 179 | Nova                  | temperate japonica | Clor 9459  | 114  | 4 | Ind_GH | G A 1 C 1 5 A C C G C G T G C 0 T C T 3 23 G A T T C C A T 14 C G G A A 0 C A C A A G G C T C T T A C C 4 0 C |
| 180 | Saturn                | temperate japonica | Clor 9540  | 140  | 4 | Ind_GH | G A 1 C 1 5 A C C G C G T G C 0 T C T 3 23 G A T T C C A T 14 C G G A A 0 C A C A A G G C T C T T A C C 4 0 C |
| 181 | Jambu                 | tropical japonica  | IRGC 17757 | 75   | 4 | Ind_GH | G A 1 C 1 5 A C C G C G T G C 0 T C T 3 23 G A T T C C A T 14 C G G A A 0 C A C A A G G C T C T T A C C 4 0 C |
| 182 | Tondok                | tropical japonica  | IRGC 3575  | 164  | 4 | Ind_GH | G A 1 C 1 5 A C C G C G T G C 0 T C T 3 23 G A T T C C A T 14 C G G A A 0 C A C A A G G C T C T T A C C 4 0 C |
| 183 | Padi Kasalle          | tropical japonica  | IRGC 8261  | 122  | 4 | Ind_GH | G A 1 C 1 5 A C C G C G T G C 0 T C T 3 23 G A T T C C A T 14 C G G A A 0 C A C A A G G C T C T T A C C 4 0 C |
| 184 | Lemont                | tropical japonica  | IRGC 66756 | 101  | 4 | Ind_GH | G A 1 C 1 5 A C C G C G T G C 0 T C T 3 23 G A T T C C A T 14 C G G A A 0 C A C A A G G C T C T T A C C 4 0 C |
| 185 | S4542A3-49B-2B12      | tropical japonica  | IRGC 1923  | 139  | 4 | Ind_GH | G A 1 C 1 5 A C C G C G T G C 0 T C T 3 23 G A T T C C A T 14 C G G A A 0 C A C A A G G C T C T T A C C 4 0 C |
| 186 | Sinampaga Selection   | tropical japonica  | IRGC 3967  | 147  | 4 | Ind_GH | G A 1 C 1 5 A C C G C G T G C 0 T C T 3 23 G A T T C C A T 14 C G G A A 0 C A C A A G G C T C T T A C C 4 0 C |
| 187 | SINAGUING             | tropical japonica  | Clor 3337  | 149  | 4 | Ind_GH | G A 1 C 1 5 A C C G C G T G C 0 T C T 3 23 G A T T C C A T 14 C G G A A 0 C A C A A G G C T C T T A C C 4 0 C |
| 188 | B6616A4-22-Bk-5-4     | tropical japonica  | Clor 9881  | 167  | 4 | Ind_GH | G A 1 C 1 5 A C C G C G T G C 0 T C T 3 23 G A T T C C A T 14 C G G A A 0 C A C A A G G C T C T T A C C 4 0 C |
| 189 | Sultani               | tropical japonica  | Clor 1658  | 150  | 4 | Ind_GH | G A 1 C 1 5 A C C G C G T G C 0 T C T 3 23 G A T T C C A T 14 C G G A A 0 C A C A A G G C T C T T A C C 4 0 C |
| 190 | Fortuna               | tropical japonica  | Clor 1344  | 54   | 4 | Ind_GH | G A 1 C 1 5 A C C G C G T G C 0 T C T 3 23 G A T T C C A T 14 C G G A A 0 C A C A A G G C T C T T A C C 4 0 C |
| 191 | Khao Hawm             | tropical japonica  | IRGC 24225 | 89   | 4 | Ind_GH | G A 1 C 1 5 A C C G C G T G C 0 T C T 3 23 G A T T C C A T 14 C G G A A 0 C A C A A G G C T C T T A C C 4 0 C |
| 192 | N 22                  | tropical japonica  | IRGC 6264  | 111  | 4 | Ind_GH | G A 1 C 1 5 A C C G C G T G C 0 T C T 3 23 G A T T C C A T 14 C G G A A 0 C A C A A G G C T C T T A C C 4 0 C |
| 193 | CO18                  | indica             | IRGC 6331  | 35   | 5 | Ind_GH | G A 1 C 0 5 C C C G C G T G C 0 T T T 3 23 C A T T C C A T 14 C G G A A 0 C A C G A G T C T C T G A C C 4 1 T |
| 194 | TKM6                  | indica             | IRGC 237   | 162  | 5 | Ind_GH | G A 1 C 0 5 C C C G C G T G C 0 T T T 3 23 C A T T C C A T 14 C G G A A 0 C A C G A G T C T C T G A C C 4 1 T |
| 195 | CO 25                 | indica             | IRGC 3697  | 34   | 5 | Ind_GH | G A 1 C 0 5 C C C G C G T G C 0 T T T 3 23 C A T T C C A T 14 C G G A A 0 C A C G A G T C T C T G A C C 4 1 T |
| 196 | RTS4                  | indica             | IRGC 8177  | 138  | 5 | Ind_GH | G A 1 C 0 5 C C C G C G T G C 0 T T T 3 23 C A T T C C A T 14 C G G A A 0 C A C G A G T C T C T G A C C 4 1 T |
| 197 | Basmati               | Group V            | IRGC 27805 | 12   | 6 | Ind_GH | T G 1 C 0 5 C C A G C C T G C 0 T T T 3 23 C A T T C C A T 14 C G G A A 0 C A C A A G G C T C T G A C C 4 0 T |
| 198 | Kun-Min-Tsieh-Hunan   | indica             | IRGC 8195  | 97   | 6 | Ind_GH | T G 1 C 0 5 C C A G C C T G C 0 T T T 3 23 C A T T C C A T 14 C G G A A 0 C A C A A G G C T C T G A C C 4 0 T |
| 199 | Hsia-Chioh-Keh-Tu     | indica             | IRGC 8240  | 66   | 6 | Ind_GH | T G 1 C 0 5 C C A G C C T G C 0 T T T 3 23 C A T T C C A T 14 C G G A A 0 C A C A A G G C T C T G A C C 4 0 T |
| 200 | Chiem Chanh           | indica             | IRGC 10214 | 30   | 6 | Ind_GH | T G 1 C 0 5 C C A G C C T G C 0 T T T 3 23 C A T T C C A T 14 C G G A A 0 C A C A A G G C T C T G A C C 4 0 T |
| 201 | Shuang-Chiang         | indica             | IRGC 8242  | 146  | 6 | Ind_GH | T G 1 C 0 5 C C A G C C T G C 0 T T T 3 23 C A T T C C A T 14 C G G A A 0 C A C A A G G C T C T G A C C 4 0 T |
| 202 | Taducan               | indica             | PI 280681  | 163  | 6 | Ind_GH | T G 1 C 0 5 C C A G C C T G C 0 T T T 3 23 C A T T C C A T 14 C G G A A 0 C A C A A G G C T C T G A C C 4 0 T |
| 203 | IR 36                 | indica             | IRGC 30416 | 71   | 7 | Ind_GH | T G 0 T 0 0 C C C T C C T G C 0 T T T 3 0 C A T T C C A T 14 C A G A A 0 C A T A A G G C T C C G A A C 0 0 C  |
| 204 | BLACK GORA            | aus                | IRGC 40275 | 19   | 7 | Ind_GH | T G 0 T 0 0 C C C T C C T G C 0 T T T 3 0 C A T T C C A T 14 C A G A A 0 C A T A A G G C T C C G A A C 0 0 C  |
| 205 | Mehr                  | aus                | IRGC12883  | 105  | 7 | Ind_GH | T G 0 T 0 0 C C C T C C T G C 0 T T T 3 0 C A T T C C A T 14 C A G A A 0 C A T A A G G C T C C G A A C 0 0 C  |
| 206 | ARC 10177             | aus                | IRGC 12386 | 4    | 7 | Ind_GH | T G 0 T 0 0 C C C T C C T G C 0 T T T 3 0 C A T T C C A T 14 C A G A A 0 C A T A A G G C T C C G A A C 0 0 C  |
| 207 | Khao Gaew             | aus                | IRGC 24224 | 88   | 7 | Ind_GH | T G 0 T 0 0 C C C T C C T G C 0 T T T 3 0 C A T T C C A T 14 C A G A A 0 C A T A A G G C T C C G A A C 0 0 C  |
| 208 | ARC 7229              | aus                | IRGC 12331 | 6    | 7 | Ind_GH | T G 0 T 0 0 C C C T C C T G C 0 T T T 3 0 C A T T C C A T 14 C A G A A 0 C A T A A G G C T C C G A A C 0 0 C  |
| 209 | BJ 1                  | aus                | IRGC 45195 | 18   | 7 | Ind_GH | T G 0 T 0 0 C C C T C C T G C 0 T T T 3 0 C A T T C C A T 14 C A G A A 0 C A T A A G G C T C C G A A C 0 0 C  |
| 210 | Dhala Shaitta         | aus                | IRGC 3686  | 44   | 7 | Ind_GH | T G 0 T 0 0 C C C T C C T G C 0 T T T 3 0 C A T T C C A T 14 C A G A A 0 C A T A A G G C T C C G A A C 0 0 C  |
| 211 | Phudugey              | aus                | IRGC 32399 | 131  | 7 | Ind_GH | T G 0 T 0 0 C C C T C C T G C 0 T T T 3 0 C A T T C C A T 14 C A G A A 0 C A T A A G G C T C C G A A C 0 0 C  |
| 212 | T 1                   | aus                | IRGC 6294  | 152  | 7 | Ind_GH | T G 0 T 0 0 C C C T C C T G C 0 T T T 3 0 C A T T C C A T 14 C A G A A 0 C A T A A G G C T C C G A A C 0 0 C  |
| 213 | Chuan 4               | aus                | IRGC 17052 | 33   | 7 | Ind_GH | T G 0 T 0 0 C C C T C C T G C 0 T T T 3 0 C A T T C C A T 14 C A G A A 0 C A T A A G G C T C C G A A C 0 0 C  |
| 214 | DV85                  | aus                | IRGC 8839  | 49   | 7 | Ind_GH | T G 0 T 0 0 C C C T C C T G C 0 T T T 3 0 C A T T C C A T 14 C A G A A 0 C A T A A G G C T C C G A A C 0 0 C  |
| 215 | DA8                   | aus                | IRGC 6422  | AUS3 | 7 | Ind_GH | T G 0 T 0 0 C C C T C C T G C 0 T T T 3 0 C A T T C C A T 14 C A G A A 0 C A T A A G G C T C C G A A C 0 0 C  |
| 216 | JC148                 | aus                | IRGC 9069  | AUS5 | 7 | Ind_GH | T G 0 T 0 0 C C C T C C T G C 0 T T T 3 0 C A T T C C A T 14 C A G A A 0 C A T A A G G C T C C G A A C 0 0 C  |
| 217 | Kalamkati             | aus                | IRGC 45975 | 81   | 7 | Ind_GH | T G 0 T 0 0 C C C T C C T G C 0 T T T 3 0 C A T T C C A T 16 C A G A A 0 C A T A A G G C T C C G A A C 0 0 C  |
| 218 | MAHIN KUNDUZ          | Group V            | IRGC 58288 | 8182 | 7 | Ind_GH | T G 0 T 0 0 C C C T C C T G C 0 T T T 3 0 C A T T C C A T 14 C A G A A 0 C A T A A G G C T C C G A A C 0 0 C  |
| 219 | Basmati 334           | Group V            | IRGC 27819 | F17  | 8 | Ind_GH | G A 1 C 0 5 C C C G T C G A C 0 T T T 3 23 C A C T T C A A 12 A G G A A 0 C T C G A G T C A T T G T C T 4 1 T |
| 220 | Basmati mehtrah       | Group V            | IRGC 78469 | F80  | 8 | Ind_GH | G A 1 C 0 5 C C C G T C G A C 0 T T T 3 23 C A C T T C A A 12 A G G A A 0 C T C G A G T C A T T G T C T 4 1 T |
| 221 | Basmati Mehtrah       | Group V            | IRGC 78469 | 2225 | 8 | Ind_GH | G A 1 C 0 5 C C C G T C G A C 0 T T T 3 23 C A C T T C A A 12 A G G A A 0 C T C G A G T C A T T G T C T 4 1 T |
| 222 | BEGUMI 302            | Group V            | IRGC 27856 | 8178 | 8 | Ind_GH | G A 1 C 0 5 C C C G T C G A C 0 T T T 3 23 C A C T T C A A 12 A G G A A 0 C T C G A G T C A T T G T C T 4 1 T |
| 223 | Firooz                | Group V            | IRGC 39261 | 53   | 8 | Ind_GH | G A 1 C 0 5 C C C G T C G A C 0 T T T 3 23 C A C T T C A A 12 A G G A A 0 C T C G A G T C A T T G T C T 4 1 T |
| 224 | Bico Branco           | Group V            | IRGC 38994 | 16   | 8 | Ind_GH | G A 1 C 0 5 C C C G T C G A C 0 T T T 3 23 C A C T T C A A 12 A G G A A 0 C T C G A G T C A T T G T C T 4 1 T |
| 225 | Ghati Kamma Nangarhar | aus                | IRGC 58278 | 58   | 8 | Ind_GH | G A 1 C 0 5 C C C G T C G A C 0 T T T 3 23 C A C T T C A A 12 A G G A A 0 C T C G A G T C A T T G T C T 4 1 T |
| 226 | Jhona 349             | aus                | IRGC 6307  | 78   | 8 | Ind_GH | G A 1 C 0 5 C C C G T C G A C 0 T T T 3 23 C A C T T C A A 12 A G G A A 0 C T C G A G T C A T T G T C T 4 1 T |
| 227 | Champa Tong 54        | aus                | IRGC 30238 | 28   | 8 | Ind_GH | G A 1 C 0 5 C C C G T C G A C 0 T T T 3 23 C A C T T C A A 12 A G G A A 0 C T C G A G T C A T T G T C T 4 1 T |
| 228 | JHONA 349             | aus                | IRGC 6307  | AUS2 | 8 | Ind_GH | G A 1 C 0 5 C C C G T C G A C 0 T T T 3 23 C A C T T C A A 12 A G G A A 0 C T C G A G T C A T T G T C T 4 1 T |

|     |                      |                          |              |      |        |        |                                                                                                               |
|-----|----------------------|--------------------------|--------------|------|--------|--------|---------------------------------------------------------------------------------------------------------------|
| 229 | GERDEH               | <i>aus</i>               | IRGC 32300   | AUS8 | 8      | Ind_GH | G A 1 C 0 5 C C G T C G A C 0 T T T 3 23 C A C T T C A A 12 A G G A A 0 C T C G A G T C A T T G T C T 4 1 T   |
| 230 | KALUBALA VEE         | <i>aus</i>               | IRGC 7702    | AUS4 | 8      | Ind_GH | G A 1 C 0 5 C C C G T C G A C 0 T T T 3 23 C A C T T C A A 12 A G G A A 0 C T C G A G T C A T T G T C T 4 1 T |
| 231 | DA16                 | <i>aus</i>               | IRGC 6245    | AUS1 | 8      | Ind_GH | G A 1 C 0 5 C C C G T C G A C 0 T T T 3 23 C A C T T C A A 12 A G G A A 0 C T C G A G T C A T T G T C T 4 1 T |
| 232 | Baugamon 14          | <i>aus</i>               | IRGC 6590    | 11   | 8      | Ind_GH | G A 1 C 0 5 C C C G T C G A C 0 T T T 3 23 C A C T T C A A 12 A G G A A 0 C T C G A G T C A T T G T C T 4 1 T |
| 233 | Basmati 1            | <i>aus</i>               | IRGC 27798   | 13   | 8      | Ind_GH | G A 1 C 0 5 C C C G T C G A C 0 T T T 3 23 C A C T T C A A 12 A G G A A 0 C T C G A G T C A T T G T C T 4 1 T |
| 234 | DZ78                 | <i>aus</i>               | IRGC 8555    | 50   | 8      | Ind_GH | G A 1 C 0 5 C C C G T C G A C 0 T T T 3 23 C A C T T C A A 12 A G G A A 0 C T C G A G T C A T T G T C T 4 1 T |
| 235 | Kasalath             | <i>aus</i>               | HO1195E      | 85   | 8      | Ind_GH | G A 1 C 0 5 C C C G T C G A C 0 T T T 3 23 C A C T T C A A 12 A G G A A 0 C T C G A G T C A T T G T C T 4 1 T |
| 236 | Wells                | <i>tropical japonica</i> | PI 612439    | 170  | 8      | Ind_GH | G A 1 C 0 5 C C C G T C G A C 0 T T T 3 23 C A C T T C A A 12 A G G A A 0 C T C G A G T C A T T G T C T 4 1 T |
| 237 | DUMAI                | <i>aus</i>               | IRGC 25852   | AUS7 | 8      | Ind_GH | G A 1 C 0 5 C C C G T C G A C 0 T T T 3 23 C A C T T C A A 12 A G G A A 0 C T C G A G T C A T T G T C T 4 1 T |
| 238 | LAKHI PURI           | <i>aus</i>               | IRGC 34712   | AUS9 | 8      | Ind_GH | G A 1 C 0 5 C C C G T C G A C 0 T T T 3 23 C A C T T C A A 12 A G G A A 0 C T C G A G T C A T T G T C T 4 1 T |
| 239 | EH-1A-Chiu           | <i>tropical japonica</i> | IRGC 8241    | 52   | Recomb |        | G A 1 C 1 5 A C A G C G T G C 0 T T T 3 23 C A T T C C A T 4 C G G A A 0 C A C A A G G C T C T G A C C 4 0 T  |
| 240 | BYAKKOKU Y 5006 SELN | <i>indica</i>            | Clor 12248   | 21   | Recomb |        | G A 1 C 0 5 C C A G T C G G C 0 T T T 3 23 C A T T C C A T 2 C G G A A 0 C A C A A G G C T C T G A C C 4 0 T  |
| 241 | BAILAM               | <i>aus</i>               | IRGC 25835   | AUS6 | Recomb |        | G A 1 C 0 5 C C C G T C G A C 0 T T T 3 0 C A T C C T A T 14 C A G A A 0 C A T A A G G C T C C G A A C 0 1 T  |
| 242 | FR13 A               | <i>aus</i>               | IRIS 2254721 | 4891 | Recomb |        | G A 1 C 0 5 C C T C C T G C 0 T T T 3 0 C A T C C T A T 14 C A G A A 0 C A T A A G G C T C C G A A C 0 0 C    |

\* All polymorphisms >5% frequency in the population. The polymorphisms are listed as either alternative forms of a SNP or as alternative forms of an insertion/deletion. For indels, the number represents the number of deleted base pairs relative to the alternative allele ("0").

\*\* The SSR polymorphism at position 20249280 is also listed as the number of deleted base pairs, with 0 to 16 corresponding to TA(14) to TA(6).
