# Supplementary material
Source: PubMed Central journal article supplement (PMC2732888)
Supplement: 0904077106_ST4_PDF.pdf [file 0904077106_ST4_PDF.pdf]

**Table S4**  
**Novel Coding Mutations in *BADH2***

| Allele #        | IRGC # | Code #    | Accession Name                            | Origin     | Subpopulation            | [2AP] | Marker   | Mutation                 | Exon |
|-----------------|--------|-----------|-------------------------------------------|------------|--------------------------|-------|----------|--------------------------|------|
| <i>badh2.2*</i> | 28473  | ANF4/8203 | Hsiang-Keng-Nuo                           | China      | <i>tropical japonica</i> | 0.66  | BadHapG1 | 7 bp deletion            | 2nd  |
| <i>badh2.3</i>  | 69874  | ANF10     | Rasomotrafotsy                            | Madagascar | <i>tropical japonica</i> | 0.74  | BadHapG1 | 2 bp deletion            | 1st  |
| <i>badh2.4</i>  | 27348  | ANF3      | Pare Baine Pulut                          | Indonesia  | <i>tropical japonica</i> | 0.59  | BadHapG7 | →T<br>(1 bp insertion)   | 10th |
| <i>badh2.5</i>  | 52787  | ANF9      | Vishunparag                               | India      | <i>aus</i>               | 0.41  | BadHapG7 | G→T<br>(substitution)    | 10th |
| <i>badh2.6</i>  | 13453  | ANF1      | Padi Wangi                                | Malaysia   | <i>indica</i>            | 0.7   | BadHapG7 | T→<br>(1 bp deletion)    | 10th |
| <i>badh2.7</i>  | 34975  | ANF6      | Katak Tara                                | India      | <i>aus</i>               | 0.37  | BadHapG9 | →G<br>(1 bp insertion)   | 14th |
|                 | 36394  | ANF7      | Suwanda Al                                | Sri Lanka  | <i>aus</i>               | 0.3   | BadHapG9 |                          | 14th |
|                 | 44204  | ANF8      | UPRB28                                    | India      | <i>aus</i>               | 0.42  | BadHapG9 |                          | 14th |
|                 | 82408  | ANF11     | Basmati Bahar<br>(Longer Grain)           | India      | <i>aus</i>               | 0.38  | BadHapG9 |                          | 14th |
|                 | 83308  | ANF12     | Basmati                                   | Nepal      | <i>aus</i>               | 0.32  | BadHapG9 |                          | 14th |
|                 | 83309  | ANF13     | Basmati                                   | Nepal      | <i>aus</i>               | 0.77  | BadHapG9 |                          | 14th |
| <i>badh2.8</i>  | 33858  | ANF5      | Yangon Saba                               | Myanmar    | Group V                  | 0.31  | BadHapG9 | →TAT<br>(3 bp insertion) | 13th |
|                 | 32960  | F22       | Balugyun                                  | Myanmar    | Group V                  | 0.42  | BadHapG9 |                          | 13th |
|                 | 97793  | SR5       | Paw San Hmwe<br>Paw San Hmwe              | Myanmar    | Group V                  | 0.43  | BadHapG9 |                          | 13th |
|                 | N/A    | 8149      | (META-PHOR)                               | Myanmar    | Group V                  | 0.49  | BadHapG9 |                          | 13th |
|                 | 33064  | 8172      | Emata Longyu                              | Myanmar    | Group V                  | 0.14  | BadHapG9 |                          | 13th |
| <i>badh2.9</i>  | 18438  | ANF2      | Pandan Wangi                              | Indonesia  | <i>tropical japonica</i> | 0.29  | BadHapG9 | G→T<br>(substitution)    | 14th |
|                 | 18438  | PW1       | Pandan Wangi                              | Indonesia  | <i>tropical japonica</i> | 0.19  | BadHapG9 |                          | 14th |
|                 | N/A    | SR8       | Pandan Wangi                              | Indonesia  | <i>tropical japonica</i> | 0.14  | BadHapG9 |                          | 14th |
|                 | N/A    | SR9       | Pandan Wangi                              | Indonesia  | <i>tropical japonica</i> | 0.18  | BadHapG9 |                          | 14th |
|                 | 79569  | 8517      | Mentik Wangi<br>Pandan Wangi <sup>8</sup> | Indonesia  | <i>tropical japonica</i> | N/A   | BadHapG9 |                          | 14th |
|                 | N/A    | 8151      | (META-PHOR)                               | Indonesia  | <i>tropical japonica</i> | 0.08  | BadHapG9 |                          | 14th |

|                 |        |            |                |         |                          |      |          |                       |      |
|-----------------|--------|------------|----------------|---------|--------------------------|------|----------|-----------------------|------|
| <i>badh2.10</i> | 78746  | 8192       | Tainung 72     | Taiwan  | <i>tropical japonica</i> | 0.35 | BadHapG9 | C→T<br>(substitution) | 13th |
|                 | 5394   | 8215       | Shiratama      | Japan   | <i>tropical japonica</i> | N/A  | BadHapG9 |                       | 13th |
| WT              | 90687  | ANF14      | Khau Tan Luong | Vietnam | <i>tropical japonica</i> | 0.79 |          |                       |      |
|                 | LG6732 | K2/C7/8156 | Kay Noi Leuang | Laos    | <i>tropical japonica</i> | 0.76 |          |                       |      |

\*The *badh2.2* allele was first identified by Shi et al., 2008 (Ref. 15)
