# Supplementary material
Source: PubMed Central journal article supplement (PMC2732888)
Supplement: 0904077106_ST5_PDF.pdf [file 0904077106_ST5_PDF.pdf]

**Supplemental Table S5**  
**Primers Used in This Study**

| Included in Fig. 1A | Marker Has AIP; Included in Fig. 1B | Included in Table 2 & Figure 3 | Old Marker Name | New Marker Name | Start    | End      | Forward                 | Reverse                 | Tm |
|---------------------|-------------------------------------|--------------------------------|-----------------|-----------------|----------|----------|-------------------------|-------------------------|----|
|                     |                                     | X                              | BADHAPup9       | BadhapUP12      | 17020003 | 17019198 | CTCTACGTACGTCCACTTGATGA | GACCTGGTTTGACGGGAATA    | 55 |
|                     |                                     | X                              | BADHAPup8       | BadhapUP11      | 17589371 | 17590115 | TGATCTTCAAAATGTTGCTTCC  | TCGCCTTTTATAAGACCAGTCC  | 55 |
|                     |                                     | X                              | BADHAPup7       | BadhapUP10      | 18237475 | 18238153 | AATGTGGGGCACAAGTAAATG   | CCATTGACTTCGCAGTTCCG    | 55 |
|                     | X                                   | X                              | ARO19           | BadhapUP9       | 18933350 | 18933699 | CCACCCTTTAGAAAAGCCAAGT  | GGACACATATCGGAGCGTATC   | 55 |
|                     | X                                   | X                              | BADHAPup6.5     | BadhapUP8       | 19588765 | 19589793 | CAAAATCGTAAAACGGGATGAG  | CTTCTTAGCTGAAGGCTGAACG  | 55 |
|                     |                                     | X                              | BADHAPup6       | BadhapUP7       | 19934276 | 19935046 | ATGGAACAGCACTTGGGCATC   | CACGATGGTGCTCCAGGAT     | 55 |
|                     | X                                   | X                              | BADHAPup4       | BadhapUP6       | 20150703 | 20151430 | CATTGGCCTCTACACCAT      | CCACCAATGATCACTCTCTCTT  | 55 |
|                     | X                                   | X                              | BADHAPup3       | BadhapUP5       | 20180146 | 20180845 | GCCGGAGGTATGACATGGA     | TCCTGACAACGGTCCAGATG    | 55 |
|                     | X                                   | X                              | BADHAPup2       | BadhapUP4       | 20202769 | 20203215 | TCCCCATTGTGGTGGTACA     | CCGTCAAAGGTAATGGTCACT   | 55 |
|                     | X                                   | X                              | BADHAPup1       | BadhapUP3       | 20228635 | 20229212 | GAAGCAAGTGGAAATTGCAAAA  | GCAGTTGGCCACATAAACAA    | 55 |
|                     | X                                   | X                              | ARO9            | BadhapUP2       | 20242081 | 20242544 | CATGAATGTTCCCGTTGAAA    | GCAGGTGGCAGTCCACTACT    | 55 |
|                     | X                                   | X                              | PRO2            | BadhapUP1       | 20244602 | 20245371 | CTTGGTGGTAAAGTCGATGCC   | TTGTCTCTGCAATGAAGCTTGT  | 58 |
|                     | X                                   | X                              | ARO6            | MITE            | 20245672 | 20245971 | ACCGACTTAAATACGAACGATG  | GTCAAACCTCCGACGTCATA    | 55 |
| X                   |                                     | X                              | IN1             | BadhapG1        | 20246844 | 20247918 | CGAAGTCCGTACCAACTGC     | GGCCGTGAGCCATATACACT    | 55 |
| X                   |                                     | X                              | IN2             | BadhapG2        | 20247795 | 20248554 | AGTTGGAAGCATGGCTGATT    | CCAGCTCAGATTTCTCTCG     | 55 |
|                     |                                     | X                              | IN3             | BadhapG3        | 20248572 | 20248829 | GATTGTGGGAAGCCTCTTGA    | CGATAGGCTCTTTCCGAAGAT   | 55 |
| X                   |                                     | X                              | IN4             | BadhapG4        | 20248809 | 20249591 | ATCTTCGGAAAGAGCCTATCG   | AGGAGCTACCTTCCATGTTGC   | 55 |
| X                   |                                     | X                              | IN5             | BadhapG5        | 20249571 | 20250262 | GCAACATGGAAGGTAGCTCCT   | CCACCAAGTTCAGTGAAACAG   | 55 |
| X                   |                                     | X                              | IN6             | BadhapG6        | 20250241 | 20251070 | CTGTTTCACTGGAAGTGGTGG   | GAATAAGACGCGATGTTGCACT  | 55 |
| X                   |                                     | X                              | IN7             | BadhapG7        | 20251049 | 20251510 | AGTGCAACATCGCGTCTTATTC  | CCCTCTTCAAGTGGATCTGACA  | 55 |
| X                   |                                     | X                              | IN8             | BadhapG8        | 20251489 | 20252254 | TGTCAGATCCACTTGAAGAGGG  | GAGTATCGTTGGCCAATTCAATG | 55 |
| X                   |                                     | X                              | IN9             | BadhapG9        | 20252232 | 20252941 | CATTGAATTGGCCAACGATACTC | GGCGTACTCCGTCACTTGCT    | 55 |
|                     | X                                   | X                              | END1            | BadhapDOWN1     | 20254617 | 20255330 | ATAGTGATTCAACGGCAGCAT   | CGACATCTAGCGAGCATTG     | 55 |
|                     | X                                   | X                              | END2            | BadhapDOWN2     | 20256134 | 20256913 | GCGGTTGATCTCTCGTACC     | CAAATGGCAACTACCACCAT    | 55 |
|                     | X                                   | X                              | ARO1.5          | BadhapDOWN3     | 20258275 | 20259051 | AGGAAATGTGCGACGTCTGT    | CGTGACCACCTAAGCCGTAT    | 55 |
|                     | X                                   | X                              | BADHAPdown1     | BadhapDOWN4     | 20271039 | 20271629 | TTGAAAGATGAGAACGGCAC    | GAAATGCTACCTGAGGATTTGA  | 55 |
|                     |                                     | X                              | BADHAPdown2     | BadhapDOWN5     | 20283408 | 20283912 | TTCGAGGCGTCATCAATTT     | AAATGAGACCAGGAGTTCCAAT  | 55 |
|                     | X                                   | X                              | BADHAPdown2.5   | BadhapDOWN6     | 20292211 | 20293044 | GTTGTGCTCACACAGCTTGA    | CAGATTATCCCACTCGAAATCA  | 55 |
|                     | X                                   | X                              | BADHAPdown3     | BadhapDOWN7     | 20297924 | 20298476 | AGGCCGAACTTACGTTGT      | CTTGGCCCCACCATTACAT     | 55 |
|                     |                                     | X                              | BADHAPdown4     | BadhapDOWN8     | 20318747 | 20319033 | CCAGGAAAGCTGCTGCAC      | GTCGTAGGAGTCGGCCTTG     | 55 |
|                     | X                                   | X                              | BADHAPdown6     | BadhapDOWN9     | 20587910 | 20588319 | CAATTGTTCAGACGCACCA     | AGTCGAGAATCCTCCATCTTGC  | 55 |
|                     |                                     | X                              | BADHAPdown7     | BadhapDOWN10    | 20901884 | 20902589 | CTCCCTGAGGTGTTCTTGATG   | TCTTGCTGAAACCTGGGTATG   | 55 |
|                     | X                                   | X                              | BADHAPdown8     | BadhapDOWN11    | 21575778 | 21576441 | GAATTCGTGTGCCAGGCTA     | CGGCGTTGACGACCTGTA      | 55 |
|                     |                                     | X                              | BADHAPdown9     | BadhapDOWN12    | 22344208 | 22345014 | TCTTGCTGAAGGCGACCTAT    | TTTCGCGTCTTTCTTGTC      | 55 |
